# Supplementary material
Source: PubMed Central journal article supplement (PMC8166171)
Supplement: pnas.2100673118.sapp.pdf [file pnas.2100673118.sapp.pdf]

## Supplementary Information for

### Cell Lineage Tracing Links ER $\alpha$ Loss in Erbb2-Positive Breast Cancers to the Arising of a Highly Aggressive Breast Cancer Subtype

Yunfeng Ding, Yonghong Liu, Dong-Kee Lee, Zhangwei Tong, Xiaobin Yu, Yi Li, Yong Xu, Rainer B. Lanz, Bert W. O'Malley, Jianming Xu

Corresponding authors: Jianming Xu, E-mail: [jxu@bcm.edu](mailto:jxu@bcm.edu); and Bert W. O'Malley, E-mail: [berto@bcm.edu](mailto:berto@bcm.edu)

#### This PDF file includes:

- Supplementary Methods
- Figures S1 to S11
- Table S1
- Supplementary References

#### Supplementary Methods

##### Tissue collection, hematoxylin and eosin (H&E) staining, immunohistochemistry (IHC) and immunofluorescence (IF)

Mouse mammary glands and tumor tissues were collected, tissue sections were prepared, and H&E staining, IHC and IF were performed as described previously (1, 2). Briefly, mice were euthanized following complete anesthesia with isoflurane. Euthanized mice were transcardially perfused with phosphate buffered saline (PBS) until the liver became pale. Collected mammary glands or breast tumor tissue or lung were fixed with 4% (w/v) paraformaldehyde (PFA) at 4 °C for overnight. Samples were rinsed and washed three times with PBS for 2 hours each round, and then washed with PBS overnight at room temperature. Samples were dehydrated with 30%, 70%, and 100% ethanol, paraffin-embedded, and sectioned. For H&E staining, sections were de-paraffinized in xylene, rehydrated in 100%, 95%, 70% and 30% ethanol and water, and stained in hematoxylin for 3 min and eosin for 30 seconds. Stained sections were dehydrated with 70%, 95% and 100% ethanol, treated in xylene, and sealed for microscopy.

For IHC and IF staining, rehydrated tissue sections were boiled for antigen retrieve in a citrate buffer (pH 6.0) for 2 minutes, treated with 3% hydrogen peroxide for inactivating endogenous peroxidase, washed in PBS containing 0.05% Tween-20 (PBST), and blocked with 5% normal donkey serum for 2 hours. Prepared sections were incubated with primary antibody solutions overnight at 4 °C. Primary antibodies used in this study include: HA tag (3724, Cell Signaling), ER $\alpha$  (sc-542, Santa Cruz), RFP (600-401-379, Rockland), Ki67 (ab15580, Abcam), BrdU (sc-56258, Santa Cruz), E-cadherin (610182, BD Biosciences), Vimentin (5741S, Cell Signaling), cytokeratin 8 (K8) (MABT 329, Millipore), cytokeratin 14 (K14) (906004, Biolegend), progesterone receptor (PR) (A0098, Dako), GATA3 (5852S, Cell Signaling), FoxA1 (ab23738, Abcam), and p-ERK1/2 (4370S, Cell Signaling). Since HA-tagged Erbb2 was expressed as a transgene, HA antibody was used in IHC and IF to assay the transgenic expression of HA-tagged Erbb2 protein. For IHC staining, secondary antibodies conjugated with horseradish peroxidase were used and visualized using a DAB-staining Kit (SK-4103, Vector Laboratories). IHC-stained sections were counter-stained with Harris-Modified Hematoxylin. For IF staining, biotinylated secondary antibodies were used to incubate with sections for 1 hour at room temperature. Signals were amplified with the Tyramide Signal Amplification Kit (MP20911, Life Technologies). For double or triple IF staining, after finishing the first run of IF staining, sections were boiled for 2 minutes in the citrate buffer for antigen retrieve and the same IF staining steps were repeated one or two more times. Alexa Fluor 488 (green), Alexa Fluor 594 (red) and Alexa Fluor 680 (white) were used for visualizing IF staining signals.

### Flow cytometry

Advanced primary tumors were minced into small pieces and digested with 1.5 mM collagenase I (17018-029, Gibco) at 37°C for 2 hours with rotation. After further digestion with 0.25% trypsin and 1  $\mu$ g/ml DNase I (DN25, Sigma-Aldrich) at 37°C for 10 minutes, cells were washed with PBS containing 2% fetal bovine serum (FBS), and subsequently incubated for one hour at 4°C with biotin-conjugated antibodies against CD45 (103103, Biolegend), TER119 (30-5921-U500, Tonbo), CD140a (13-1401-82, Invitrogen), and CD31 (553371, Becton Dickinson) for excluding immune, red blood, fibroblast and endothelial cells, respectively. Cells were washed with PBS containing 2% FBS, then incubated for 10 minutes at 4°C with fluor 488-labeled streptavidin, and then washed again with PBS containing 2% FBS. Cells were sorted for RFP-positive/Fluor488-negative (RFP<sup>+</sup>/F488<sup>-</sup>) and RFP-negative/Fluor488-negative (RFP<sup>-</sup>/F488<sup>-</sup>) cells, which mainly consisted of ER $\alpha$ RFP<sup>+</sup>Erbb2<sup>+</sup> and ER $\alpha$ RFP<sup>-</sup>Erbb2<sup>-</sup> tumor cells, respectively. To obtain ER $\alpha$ <sup>+</sup> and ER $\alpha$ <sup>-</sup> luminal epithelial cells, collected mammary glands were cut into small pieces and digested with 1.5 mM collagenase I at 37°C for 1 hours with rotation. To separate branches and fat cells, the digested tissues were centrifuged at 1000 rpm for 5 minutes. The bottom fraction was resuspended, and further digested with collagenase I for 30 minutes and then 0.25% Trypsin for 10 minutes. Cells were washed with PBS containing 2% FBS, and then incubated for one hour at 4°C with FITC-labeled CD24 antibody (101805, BioLegend). Flow cytometry was performed to collect high FITC/RFP<sup>+</sup> cells, which were ER $\alpha$ <sup>+</sup> mammary gland luminal epithelial cells, and high FITC/RFP<sup>-</sup> cells, which were ER $\alpha$ <sup>-</sup> mammary gland luminal epithelial cells.

### DNA methylation

Genomic DNA samples were prepared from ER $\alpha$ RFP<sup>+</sup>Erbb2<sup>+</sup> and ER $\alpha$ RFP<sup>-</sup>Erbb2<sup>-</sup> cell-derived tumors by using the Quick DNA Miniprep Plus Kit (D4068, Zymo Research). DNA samples were treated with bisulfite solution to convert unmethylated cytosines to uracils by following the instructions of the EZ DNA methylation Kit (D5001, Zymo Research). The CpG islands near ER $\alpha$  promoters A, B and C were predicted using the web-based program MethPrimer as described previously (3). The primers used for PCR amplification of each CpG island DNA region were also designed by using MethPrimer program (3). Primers 5'-GGGTTGTTAAGTGTTCGTTTATTG and 5'-CCAAAATATTCCATAAATTTATAAAAATC were used to amplify the region with CpG island 1. Primers 5'-TAGAGGTAGGGTTAGGGTTAGTATT, and 5'-CCTCTCCATAAACATCTTAACTAC were used to amplify the region with CpG island 2. Primers 5'-AAGATGTTTATGGAGAGGGTTCGTTG and 5'-AAACCCCAAACCTATTAACACTAAAA were used to amplify the region with CpG island 3 (Fig. S5). PCR was performed with the ZymoTaq PreMix reagent (E2003, Zymo Research). PCR products were cloned using T-vector pGEM-T Easy Vector Systems (A1360, Promega). Individual colonies were picked for plasmid mini-prep. The DNA inserts in these bacteria-amplified

plasmids were sequenced to map the DNA methylation patterns in each CpG island.

### **RNA-Seq assay**

Total RNA samples were prepared from flow cytometry-purified ER $\alpha$ -RFP<sup>+</sup>ErbB2<sup>+</sup> and ER $\alpha$ -RFP<sup>-</sup>ErbB2<sup>+</sup> primary tumor cells using RNeasy Plus Mini Kit (74134, QIAGEN). RNA samples were submitted to Cancer Genomics Center at The University of Texas Health Science Center at Houston (CPRIT RP180734). Three ng of each total RNA sample was quality-checked using Agilent RNA 6000 Pico kit (#5067-1513) by Agilent Bioanalyzer 2100 (Agilent Technologies, Santa Clara, USA). All samples passed quality control standard (RIN > 7) with RNA integrity numbers (RIN) between 8.8 and 9.3. 400 ng of each total RNA sample was used for library construction using KAPA mRNA HyperPrep (KK8581, Roche) and KAPA UDI Adapter Kit (KK8727, Roche). The quality of the final libraries was examined using Agilent High Sensitive DNA Kit (#5067-4626) by Agilent Bioanalyzer 2100 (Agilent Technologies, Santa Clara, USA), and the library concentrations were determined by qPCR using Colibri Library Quantification kit (#A38524500, Thermo Fisher Scientific). The libraries were pooled evenly and went for the paired-end 75-cycle sequencing on an Illumina NextSeq 550 System (Illumina, Inc., USA) using High Output Kit v2.5 (#20024907, Illumina, Inc., USA). Forty-million reads per RNA sample were generated. RNA-Seq data were analyzed using Basepair online program (4). Raw data were preprocessed to remove low-quality reads and adapter sequences. Following the QC step, sequence reads were aligned to the reference sequence of the UCSC Genome Browser assembly mm10. Read counts for each gene transcript were measured using featureCounts (4). Differentially expressed genes between ER $\alpha$ -RFP<sup>+</sup>ErbB2<sup>+</sup> and ER $\alpha$ -RFP<sup>-</sup>ErbB2<sup>+</sup> tumor cell groups were determined using the DESeq2 software with cutoff parameters of  $p < 0.05$  and  $p$ -adjusted < 0.1 (5). Differentially expressed genes were subjected to heatmap plotting and pathway analysis. For heatmap, transcripts per million RNA molecules (TPM) for differentially expressed genes generated by RNA-Seq analysis were transformed into Z-Scores. Heatmaps were plotted by using the software package of “ComplexHeatmap” in RStudio. KEGG pathway enrichment analysis of the differentially expressed genes was performed by using the DAVID Bioinformatics Resources (6).

### **RT-qPCR assay**

RNAs were reversely transcribed into cDNAs using the Reverse Transcriptase Core Kit (4368813, Thermo Fisher). Quantitative PCR (qPCR) was performed to measure cDNA concentration by using the matched fluorescence-labeled universal TaqMan probes (4683633001, Sigma-Aldrich), gene specific primers, and qPCR MasterMix Plus Kit (05-QP2X-03-075+, Eurogentek). Primers for Rasgrf1 were 5'-AAAACCTGGACGACGAAGC and 5'-CACCCGATCTTAACTCCA, and the probe was #93 (GGACCAGA). Primers for Fgf13 were 5'-AGGCAGATGGAACCATTGAT and 5'-CCCACAGGGATGAGGTTAAA, and the probe was #56 (TGCTGTCC). Primers for Prlr were 5'-GCAGTGGCTTTGAAGGGTTA and 5'-GTTCTTCAGACTTGCCCTTCTC, and the probe was #31 (TTCCACCA). Primers for LamC3 were 5'-TCACCCTGAAGCAATGAA and 5'-GCTCCTTCTGCTCCAGCTT, and the probe was #1 (GCTCCAGG). Primers for Itga7 were 5'-CCCTGACAGTCACTACCTCGT and 5'-GGTCAGGGTCTGAGCTATCAA, and the probe was #1. The relative expression levels of these transcripts were normalized to the expression level of endogenous 18S rRNA.

### **Statistical analysis**

The number of samples assayed in each group is indicated in relevant figures. Data are presented as the mean  $\pm$  S.D. Statistical differences were determined by two-tail Student's t test for comparing two groups of data and One-Way ANOVA for comparing multiple groups of data. If  $p < 0.05$ , the difference between or among groups is considered significant.

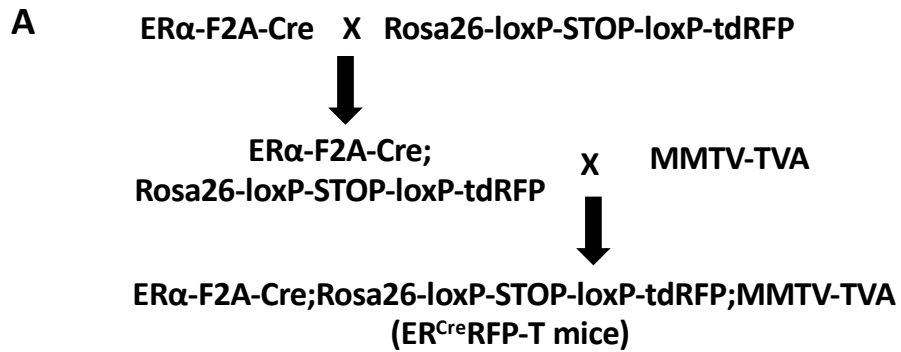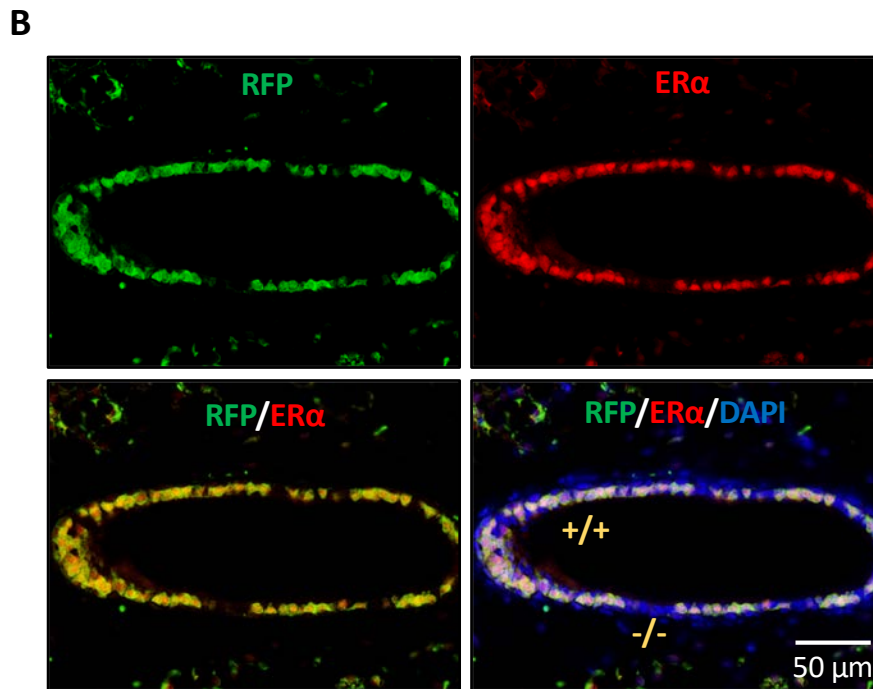

**Figure S1. Generation of the tri-genic ER<sup>Cre</sup>RFP-T mouse model for ER $\alpha$ -positive cell lineage tracing.** **A.** Mouse line breeding strategy. All ER<sup>Cre</sup>RFP-T mice used in this study were female, and heterozygous for the ER $\alpha$ -F2A-Cre, Rosa26-loxP-STOP-loxP-tdRFP, and MMTV-TVA transgenes. **B.** In female ER<sup>Cre</sup>RFP-T mice, the Cre expressed in the ER $\alpha$ <sup>+</sup> mammary gland epithelial cells excised the transcriptional STOP sequence, resulting in RFP expression. Double IF staining confirmed that ER $\alpha$  and RFP were co-expressed (indicated by +/+), and RFP (or Cre) was not expressed in ER $\alpha$ <sup>-</sup> cells (indicated by -/-). Mammary glands from 3 mice were examined and showed same results.

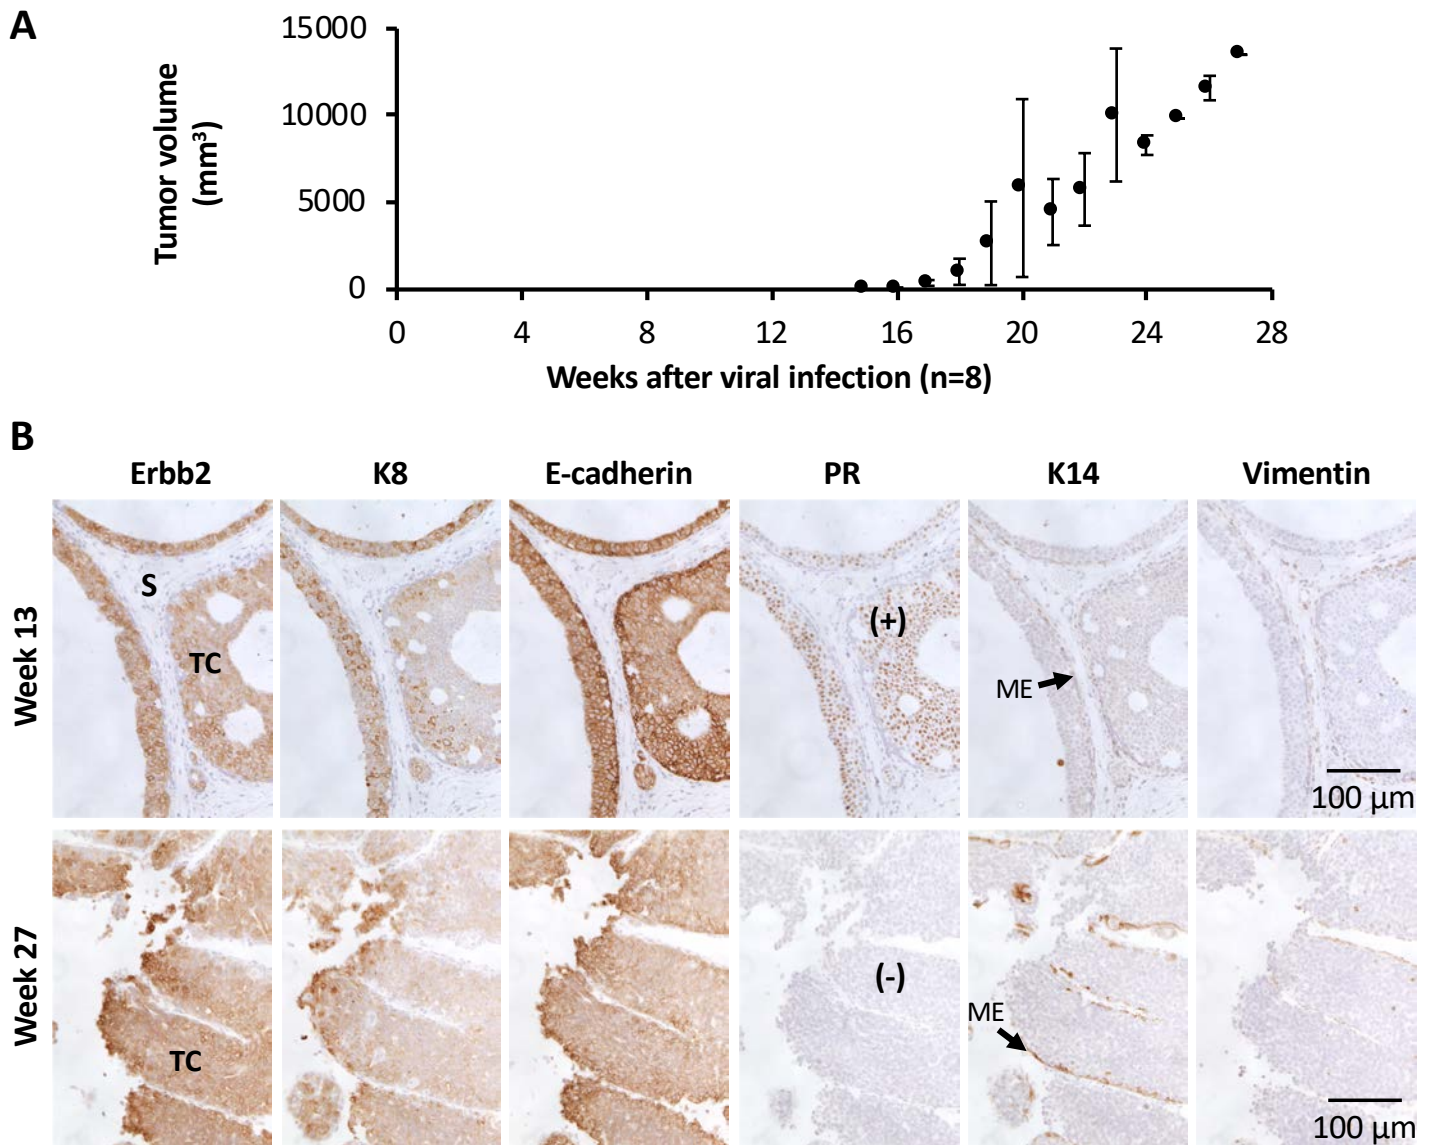

**Figure S2. Erbb2-induced tumorigenesis in female ER<sup>Cre</sup>RFP-T mice.** **A.** Mammary gland tumor growth after RCAS-ErbB2HA virus was injected. Tumor formation was detected by palpation. Tumor length (L) and width (W) were measured weekly to calculate tumor volume using the formula  $0.5 \times L \times W^2$ . Data are presented as average tumor volume  $\pm$  SD (standard deviation). **B.** Adjacent serial sections were prepared from DCIS lesions at week 13 or advanced tumors at week 27 after viral injection as indicated. IHC staining was performed with antibodies against ErbB2, cytokeratin 8 (K8), E-cadherin, progesterone receptor (PR), cytokeratin 14 (K14) and vimentin. TC, tumor cells; ME, myoepithelial cells; S, stroma; (+) and (-), positive and negative staining for PR.

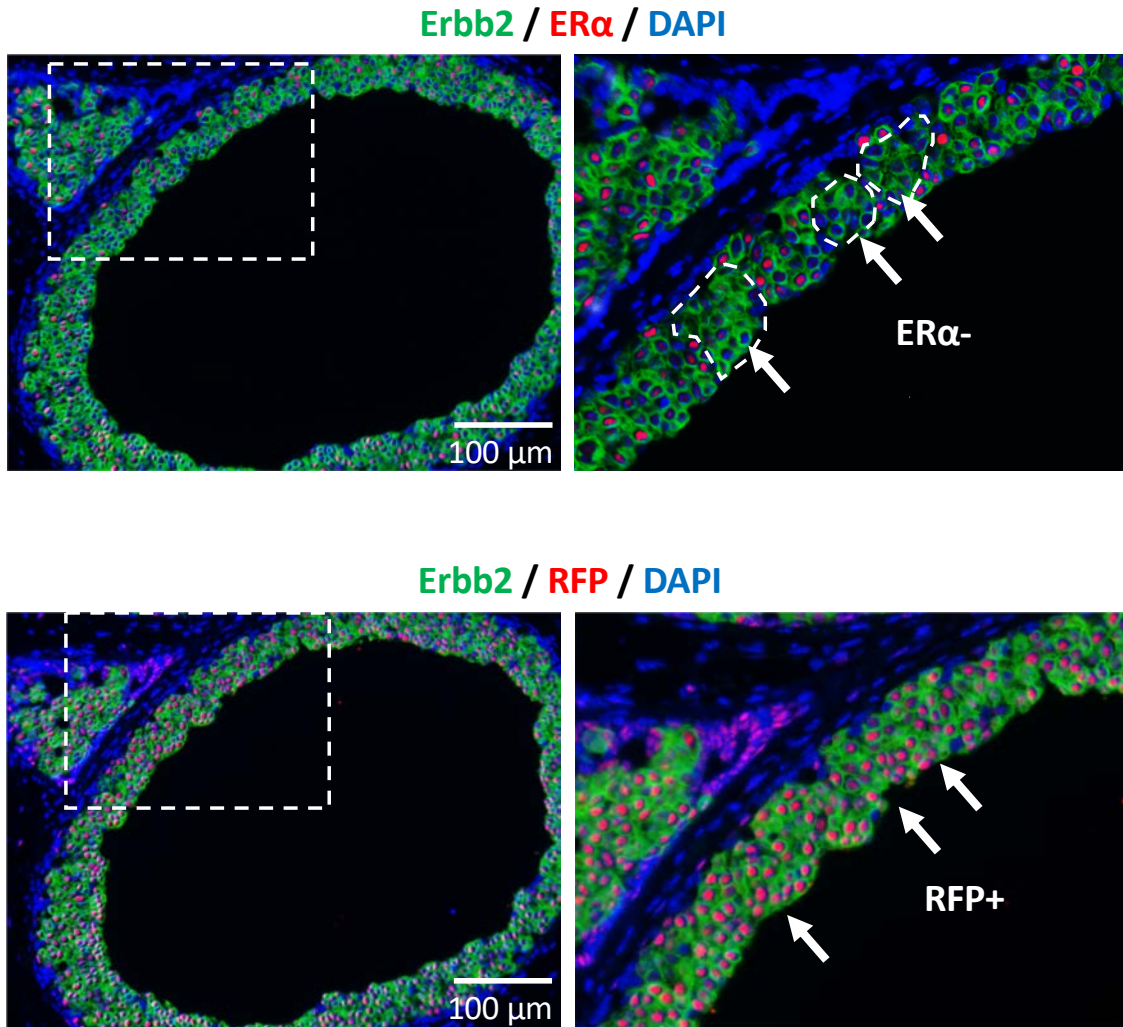

**Figure S3. Loss of ER $\alpha$  expression in a subset of RFP<sup>+</sup>ErbB2<sup>+</sup> cells in DCIS lesions.** Double IF staining for ErbB2/ER $\alpha$  and for ErbB2/RFP on adjacent sections prepared from DCIS lesions at week 13 after viral infection. Boxed regions in the left images are shown amplified in the right images. The arrows indicate areas containing ER $\alpha$ <sup>-</sup>RFP<sup>+</sup>ErbB2<sup>+</sup> tumor cells derived from ER $\alpha$ <sup>+</sup>RFP<sup>+</sup>ErbB2<sup>+</sup> tumor cells.

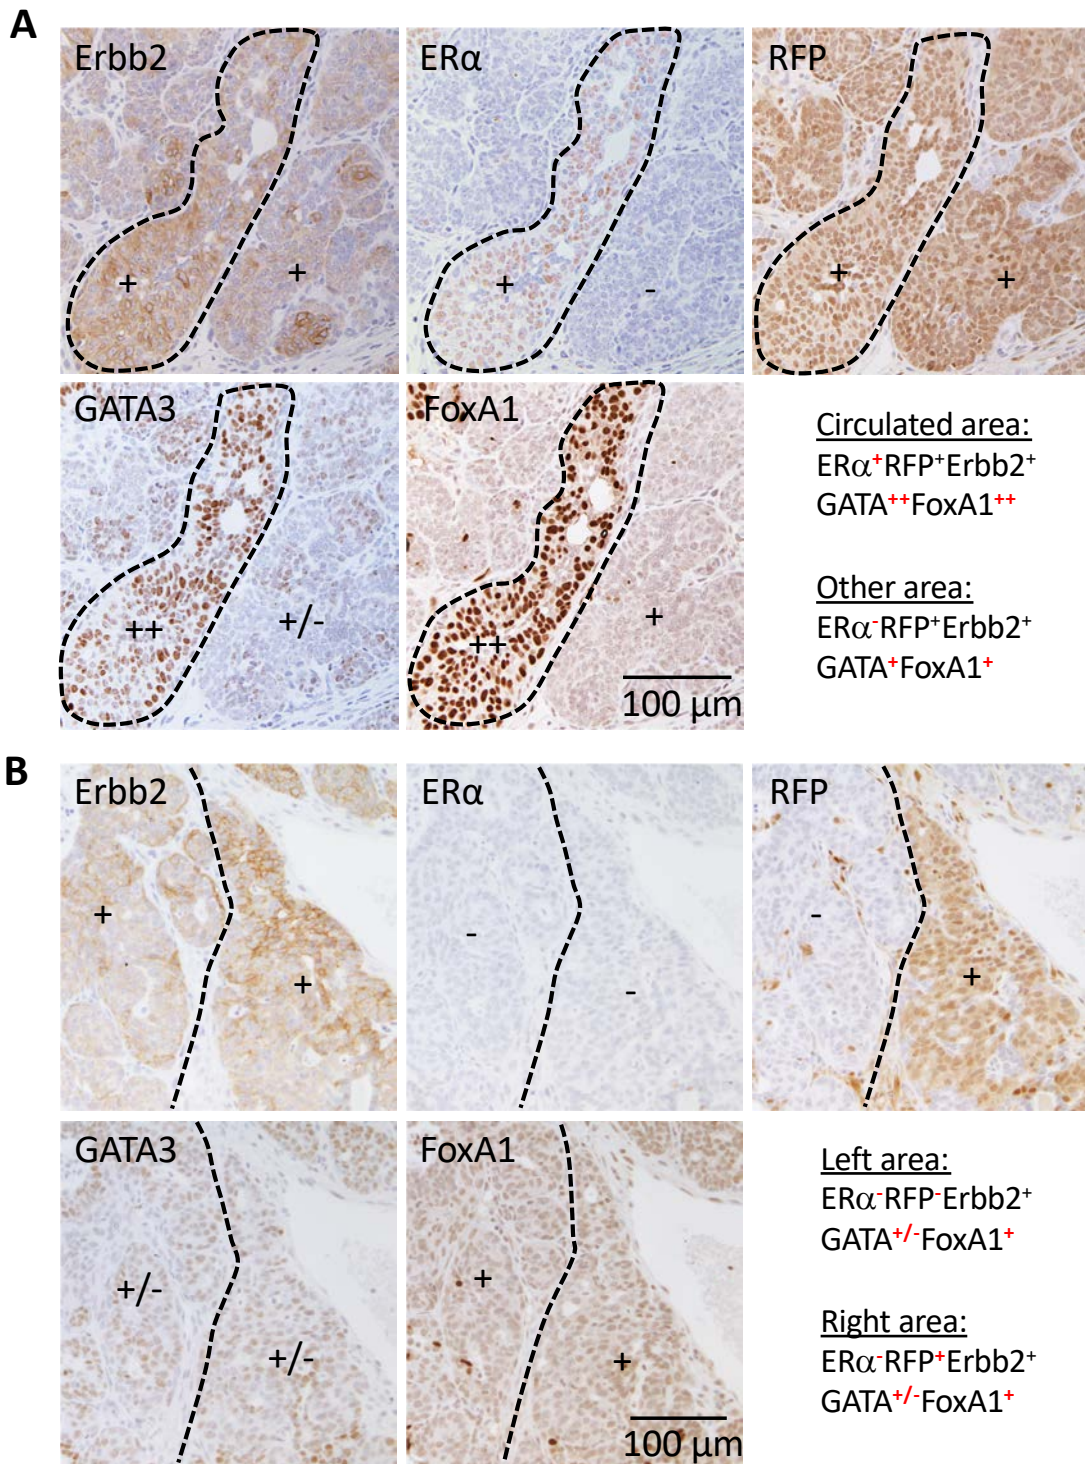

**Figure. S4.** The expression levels of GATA3 and FoxA1 proteins are high in  $ER\alpha^+RFP^+ErbB2^+$  tumor cells but low in  $ER\alpha^-RFP^+ErbB2^+$  and  $ER\alpha^-RFP^-ErbB2^+$  tumor cells. **A.** IHC for ErbB2, ER $\alpha$ , RFP, GATA3, and FoxA1 in a tumor region with  $ER\alpha^+RFP^+ErbB2^+$  (circulated area) and  $ER\alpha^-RFP^+ErbB2^+$  (outside of the circulated area) tumor cell areas. **B.** Ditto, but now in tumor regions with  $ER\alpha^-RFP^+ErbB2^+$  (lower right) and  $ER\alpha^-RFP^-ErbB2^+$  (left) tumor cell areas. “+”, “-”, and “+/-” indicate areas with tumor cells positive, negative and both positive and negative to the indicated protein in each panel.

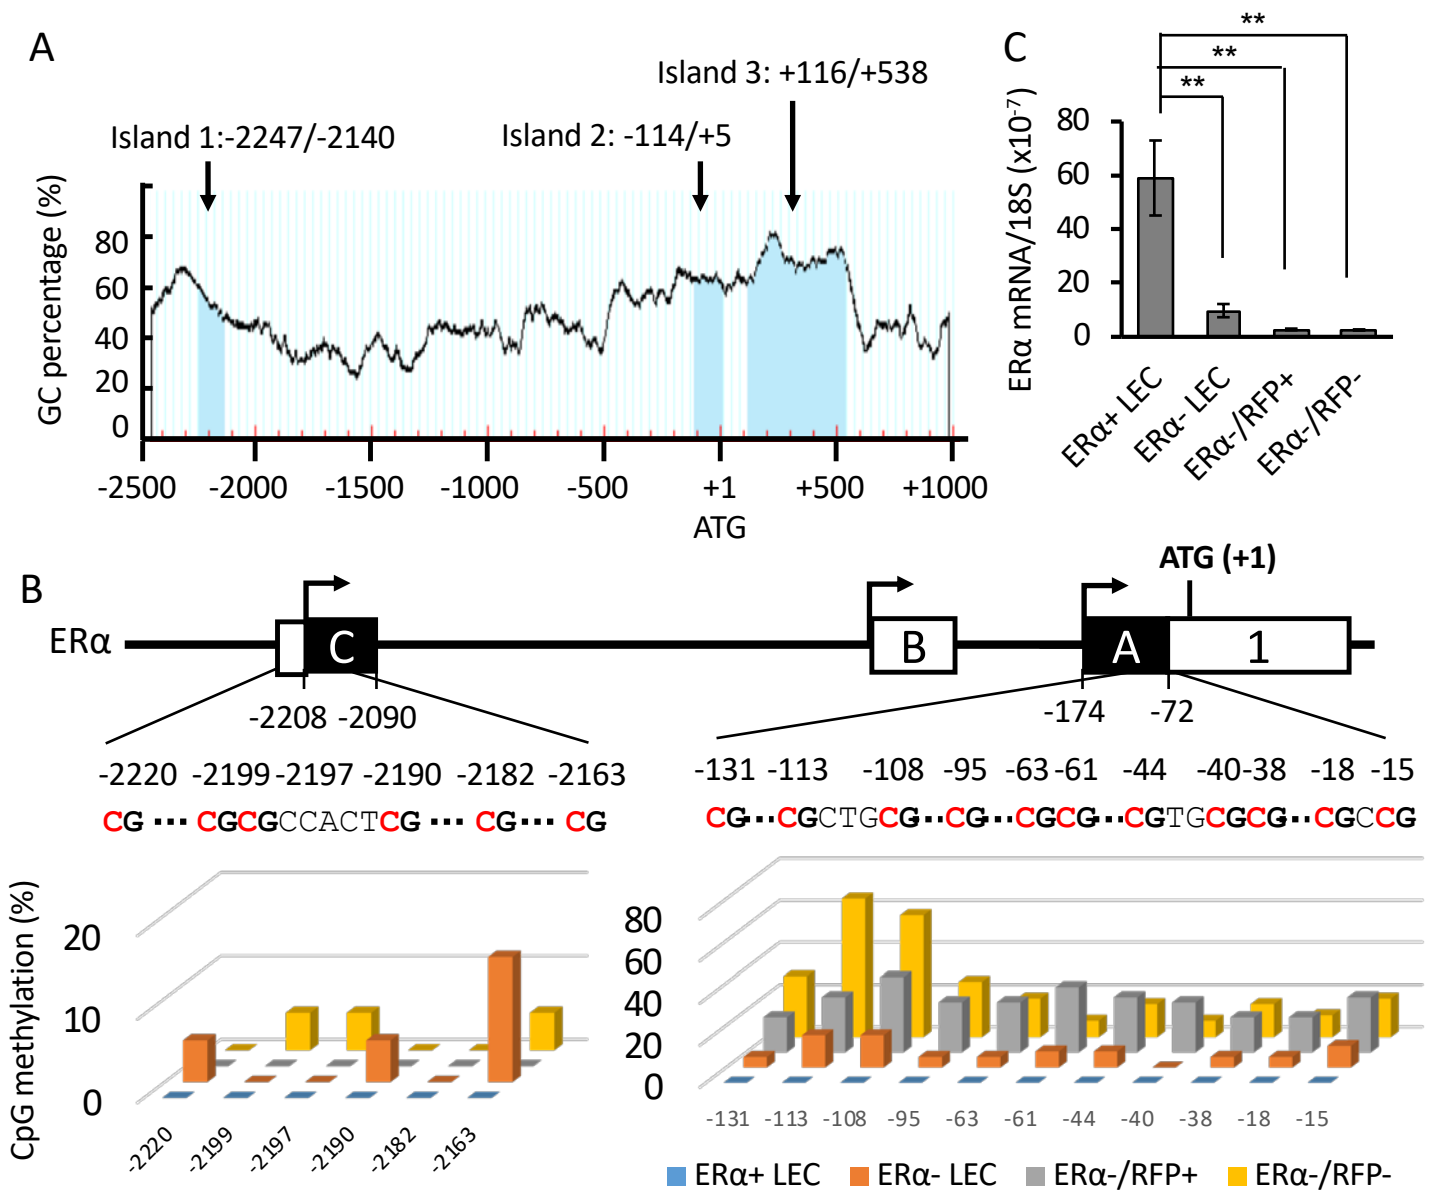

**Figure. S5. DNA methylation near ER $\alpha$  promoter regions in ER $\alpha$ - mouse tumor cells.** **A.** Three CpG islands near mouse ER $\alpha$  promoters A and C were predicted as described in Supplemental Methods. **B.** DNA methylation near ER $\alpha$  promoters A and C. The CpG island 1 near promoter C and the island 2 near promoter A are shown. Island 3 is in intron 1. DNA samples were isolated from purified normal ER $\alpha$ <sup>+</sup> and ER $\alpha$ <sup>-</sup> mouse MGECs, and ER $\alpha$ :RFP<sup>+</sup>ErbB2<sup>+</sup> and ER $\alpha$ :RFP<sup>-</sup>ErbB2<sup>+</sup> cell-derived tumors. For each group, DNA samples from MGECs of 5 mammary glands or cells of 5 tumors were equally mixed and used for analysis. For CpG island 1, 20 clones from normal ER $\alpha$ <sup>+</sup> MGEC DNA, 20 clones from normal ER $\alpha$ <sup>-</sup> MGEC DNA, 17 clones from ER $\alpha$ :RFP<sup>+</sup>ErbB2<sup>+</sup> tumor DNA, and 22 clones from ER $\alpha$ :RFP<sup>-</sup>ErbB2<sup>+</sup> tumor DNA were sequenced. For CpG island 2, 20 clones from normal ER $\alpha$ <sup>+</sup> MGEC DNA, 39 clones from normal ER $\alpha$ <sup>-</sup> MGEC DNA, 42 clones from ER $\alpha$ :RFP<sup>+</sup>ErbB2<sup>+</sup> tumor DNA, and 39 clones from ER $\alpha$ :RFP<sup>-</sup>ErbB2<sup>+</sup> tumor DNA were sequenced. For CpG island 3, 15 clones from normal ER $\alpha$ <sup>+</sup> MGEC DNA, 15 clones from normal ER $\alpha$ <sup>-</sup> MGEC DNA, 24 clones from ER $\alpha$ :RFP<sup>+</sup>ErbB2<sup>+</sup> tumor DNA, and 24 clones from ER $\alpha$ :RFP<sup>-</sup>ErbB2<sup>+</sup> tumor DNA were sequenced. The methylation profiles of CpG Islands 1 and 2 are presented in the left and right bar graphs. No methylation was detected in CpG island 3. The methylation percentage of each indicated CpG site was calculated by: (the number of methylated clones/total clones)  $\times$  100. **C.** Relative expression levels of ER $\alpha$  mRNA in normal ER $\alpha$ <sup>+</sup> and ER $\alpha$ <sup>-</sup> LECs from 3 mice, and 5 ER $\alpha$ :RFP<sup>+</sup>ErbB2<sup>+</sup> cell-derived tumors, and 5 ER $\alpha$ :RFP<sup>-</sup>ErbB2<sup>+</sup> cell-derived tumors. Endogenous ER $\alpha$  mRNA and 18S rRNA were measured by RT-qPCR, and the relative ER $\alpha$  mRNA expression levels were normalized to 18S rRNA expression levels. \*\*,  $p < 0.01$  by One-Way ANOVA test.



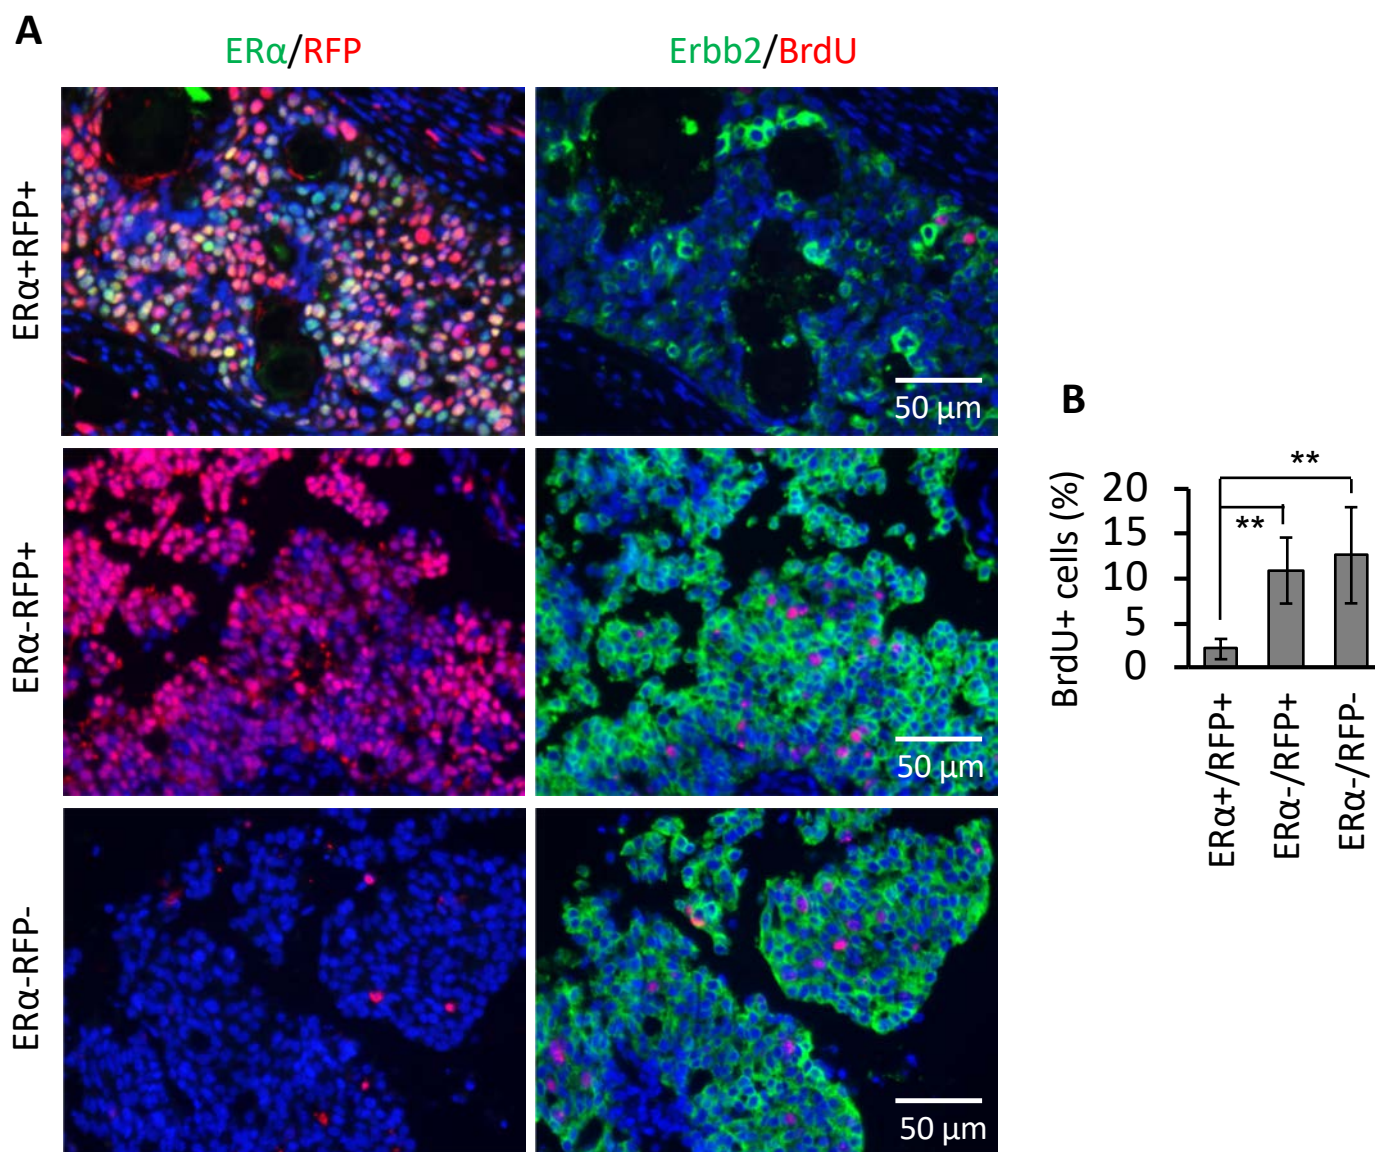

**Figure S6. ER $\alpha$ <sup>-</sup>RFP<sup>+</sup>ErbB2<sup>+</sup> and ER $\alpha$ <sup>-</sup>RFP<sup>-</sup>ErbB2<sup>+</sup> tumor cells are much more proliferative than ER $\alpha$ <sup>+</sup>RFP<sup>+</sup>ErbB2<sup>+</sup> tumor cells.** **A.** ER<sup>Cre</sup>RFP-T mice bearing advanced mammary gland tumors at week 27 after viral infection were injected with 5  $\mu$ l/g body weight of BrdU solution (RPN201, GE Healthcare) at 2 hours before sacrifice. Tumor sections were prepared for double IF staining for ER $\alpha$  and RFP to identify ER $\alpha$ <sup>+</sup>RFP<sup>+</sup>, ER $\alpha$ <sup>-</sup>RFP<sup>+</sup> and ER $\alpha$ <sup>-</sup>RFP<sup>-</sup> tumor cell regions. Adjacent sections were used for double IF staining for ErbB2 and BrdU to identify ErbB2<sup>+</sup>BrdU<sup>+</sup> and ErbB2<sup>+</sup>BrdU<sup>-</sup> tumor cells in the regions consisting of ER $\alpha$ <sup>+</sup>RFP<sup>+</sup>, ER $\alpha$ <sup>-</sup>RFP<sup>+</sup> and ER $\alpha$ <sup>-</sup>RFP<sup>-</sup> tumor cells. **B.** The percentage of ErbB2<sup>+</sup>BrdU<sup>+</sup> cells was determined by counting the numbers of ErbB2<sup>+</sup>BrdU<sup>+</sup> cells and the total numbers of each indicated tumor cell type. Data were collected from 6 independent samples and presented as average  $\pm$  SD. The numbers of ErbB2<sup>+</sup>BrdU<sup>+</sup> tumor cells in each cell type category were determined from counting 903 ER $\alpha$ <sup>+</sup>RFP<sup>+</sup>ErbB2<sup>+</sup>, 2530 ER $\alpha$ <sup>-</sup>RFP<sup>+</sup>ErbB2<sup>+</sup> and 2468 ER $\alpha$ <sup>-</sup>RFP<sup>-</sup>ErbB2<sup>+</sup> tumor cells. \*\*,  $P < 0.01$  by One-Way ANOVA test.

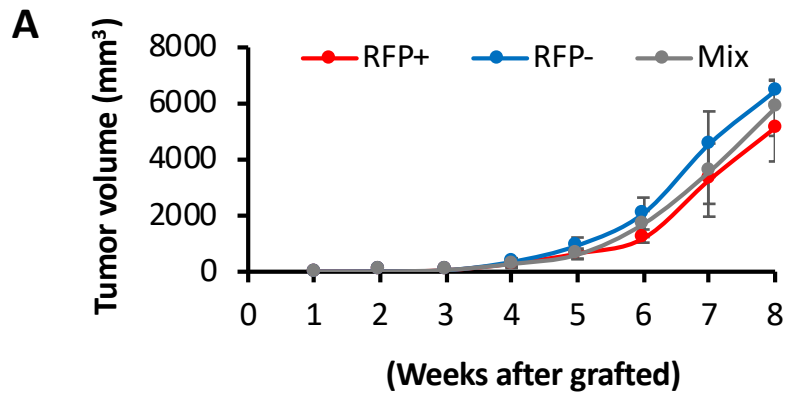

**B**  
Xenograft Tumor groups:

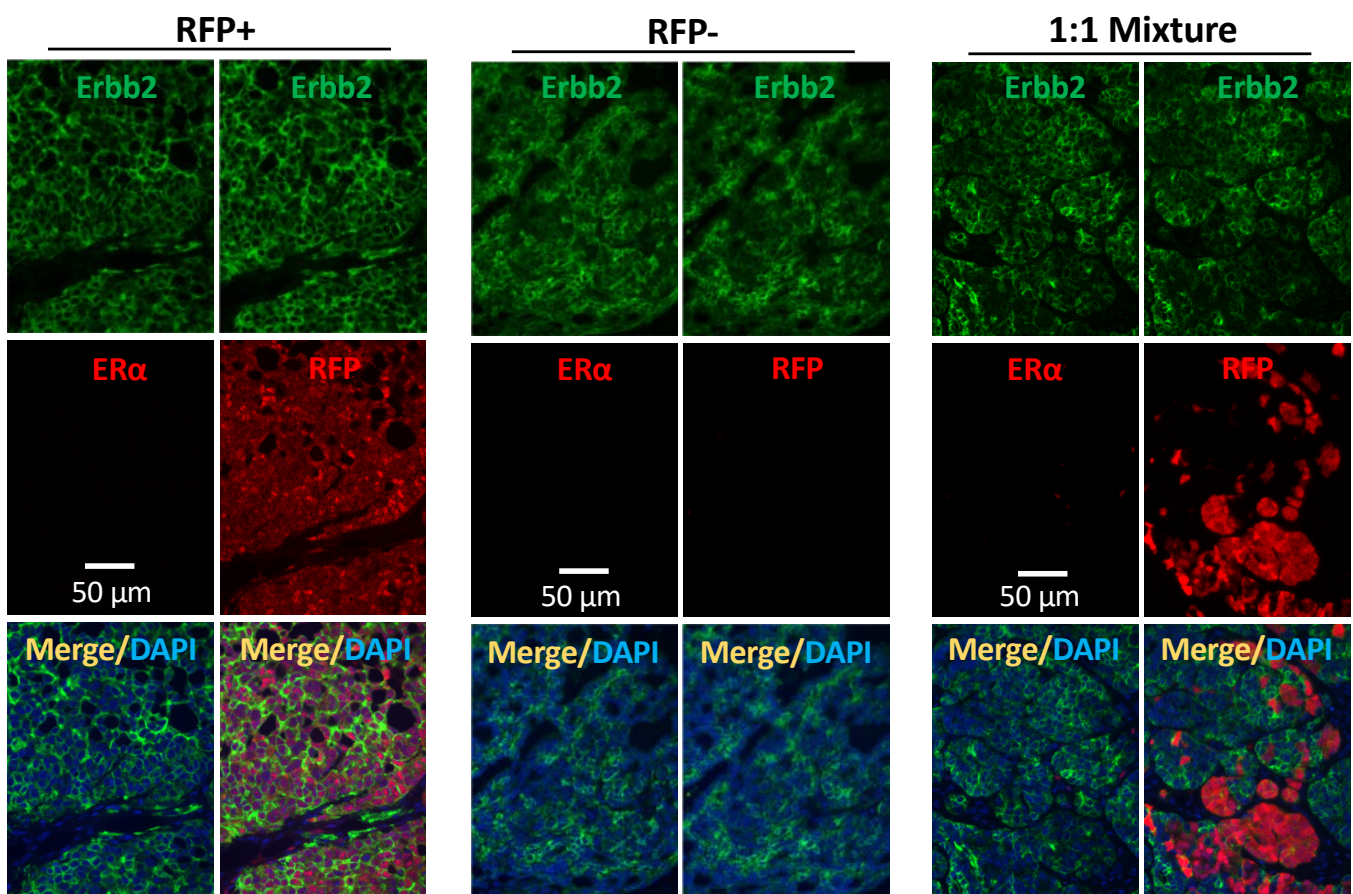

**Figure S7. Xenograft tumor growth in SCID mice and validation of expected tumor cell types.**  
**A.** Growth curves of the xenograft tumors derived from inoculated RFP<sup>+</sup>, RFP<sup>-</sup> and mixed RFP<sup>+</sup> & RFP<sup>-</sup> tumor cells in 8, 6 and 6 female SCID mice, respectively. Tumor formation was detected by palpation. Tumor length (L) and width (W) were measured weekly to calculate tumor volume using the formula  $0.5 \times L \times W^2$ . There were no significant differences in the growth rates of these tumors. **B.** Xenograft tumors in SCID mice were collected and adjacent sections were used for double IF staining for ErbB2/ER $\alpha$  and for ErbB2/RFP. As expected, ER $\alpha$ <sup>-</sup>RFP<sup>+</sup>ErbB2<sup>+</sup>, ER $\alpha$ <sup>-</sup>RFP<sup>-</sup>ErbB2<sup>+</sup>, and their mixture tumor cells were identified in the xenograft tumors derived from RFP<sup>+</sup>, RFP<sup>-</sup> and the mixture of both tumor cells. ER $\alpha$ <sup>+</sup>RFP<sup>+</sup>ErbB2<sup>+</sup> tumor cells were not found in these xenograft tumors, indicating that ER $\alpha$  does not regain expression once it ceased being expressed in ER $\alpha$ <sup>+</sup>RFP<sup>+</sup>ErbB2<sup>+</sup> tumor cells.

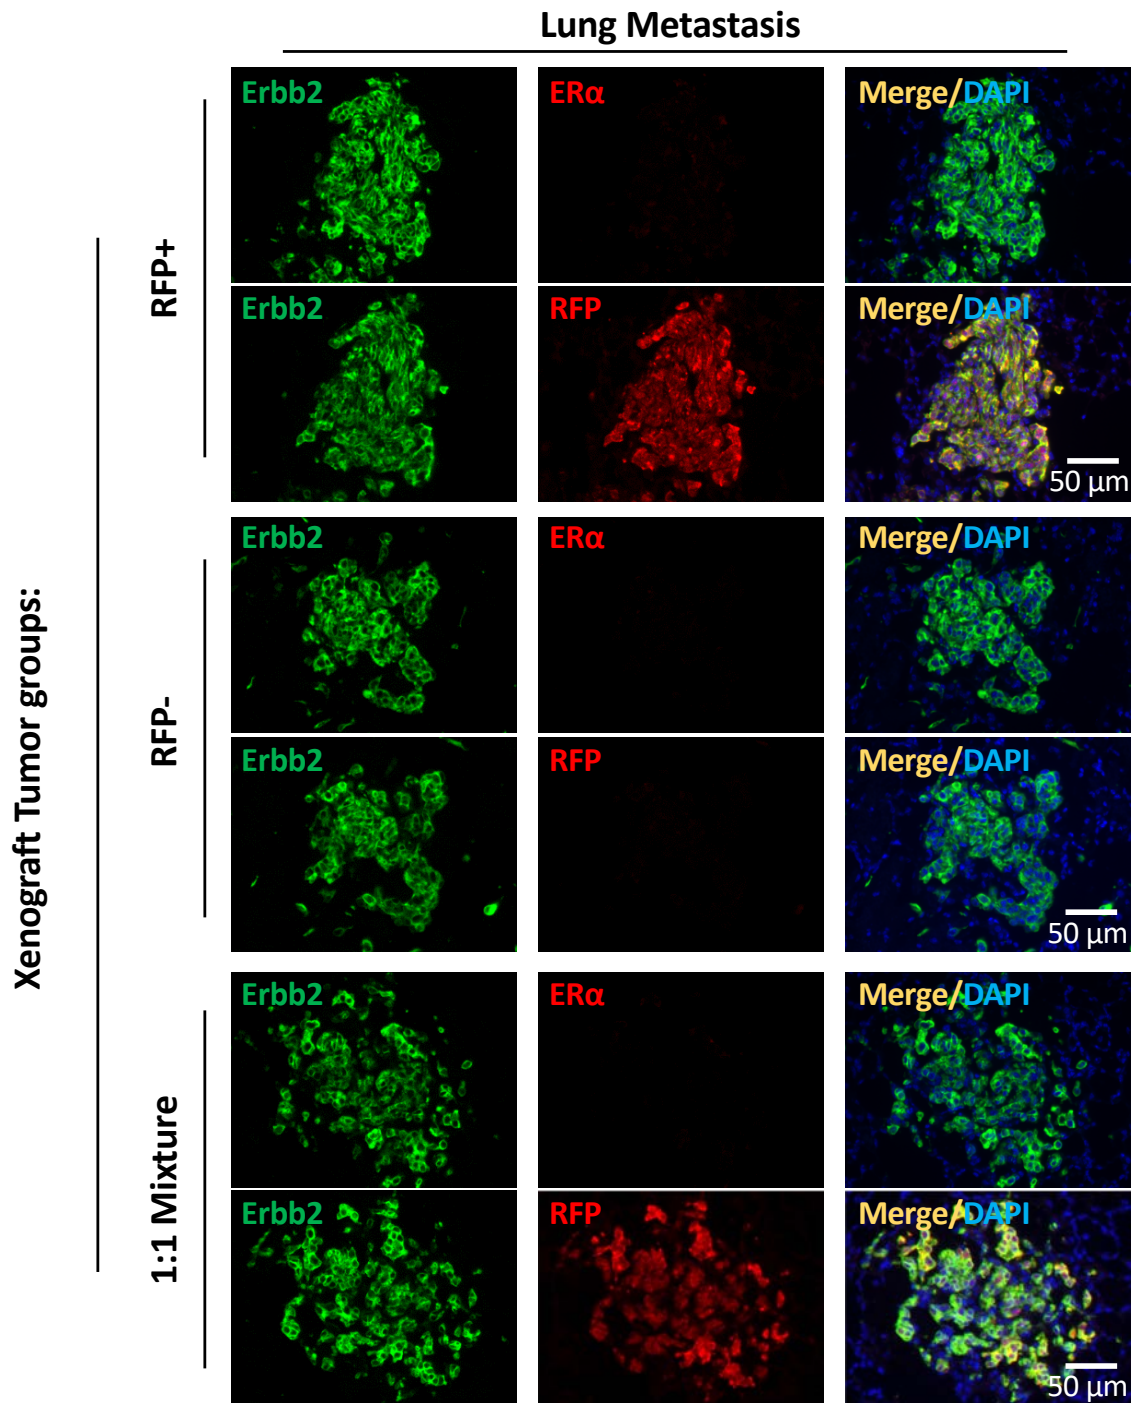

**Figure S8. ER $\alpha$ <sup>+</sup>RFP<sup>+</sup>ErbB2<sup>+</sup> tumor cells were not detected in lung metastases.** Lungs were collected from SCID mice bearing xenograft tumors derived from RFP<sup>+</sup>, RFP<sup>-</sup> and the mixture of both tumor cells as described in Figure S7. Each whole lung was sectioned. Each set of two adjacent sections with a 50  $\mu$ m interval between each set were used for double IF staining for ErbB2/ER $\alpha$  and for ErbB2/RFP. ER $\alpha$ <sup>+</sup>RFP<sup>+</sup>ErbB2<sup>+</sup> tumor cells were not found in all examined lung sections prepared from 8, 6, and 6 mice with RFP<sup>+</sup>, RFP<sup>-</sup>, and the mixed RFP<sup>+</sup> and RFP<sup>-</sup> tumor cell-derived xenografts, respectively.

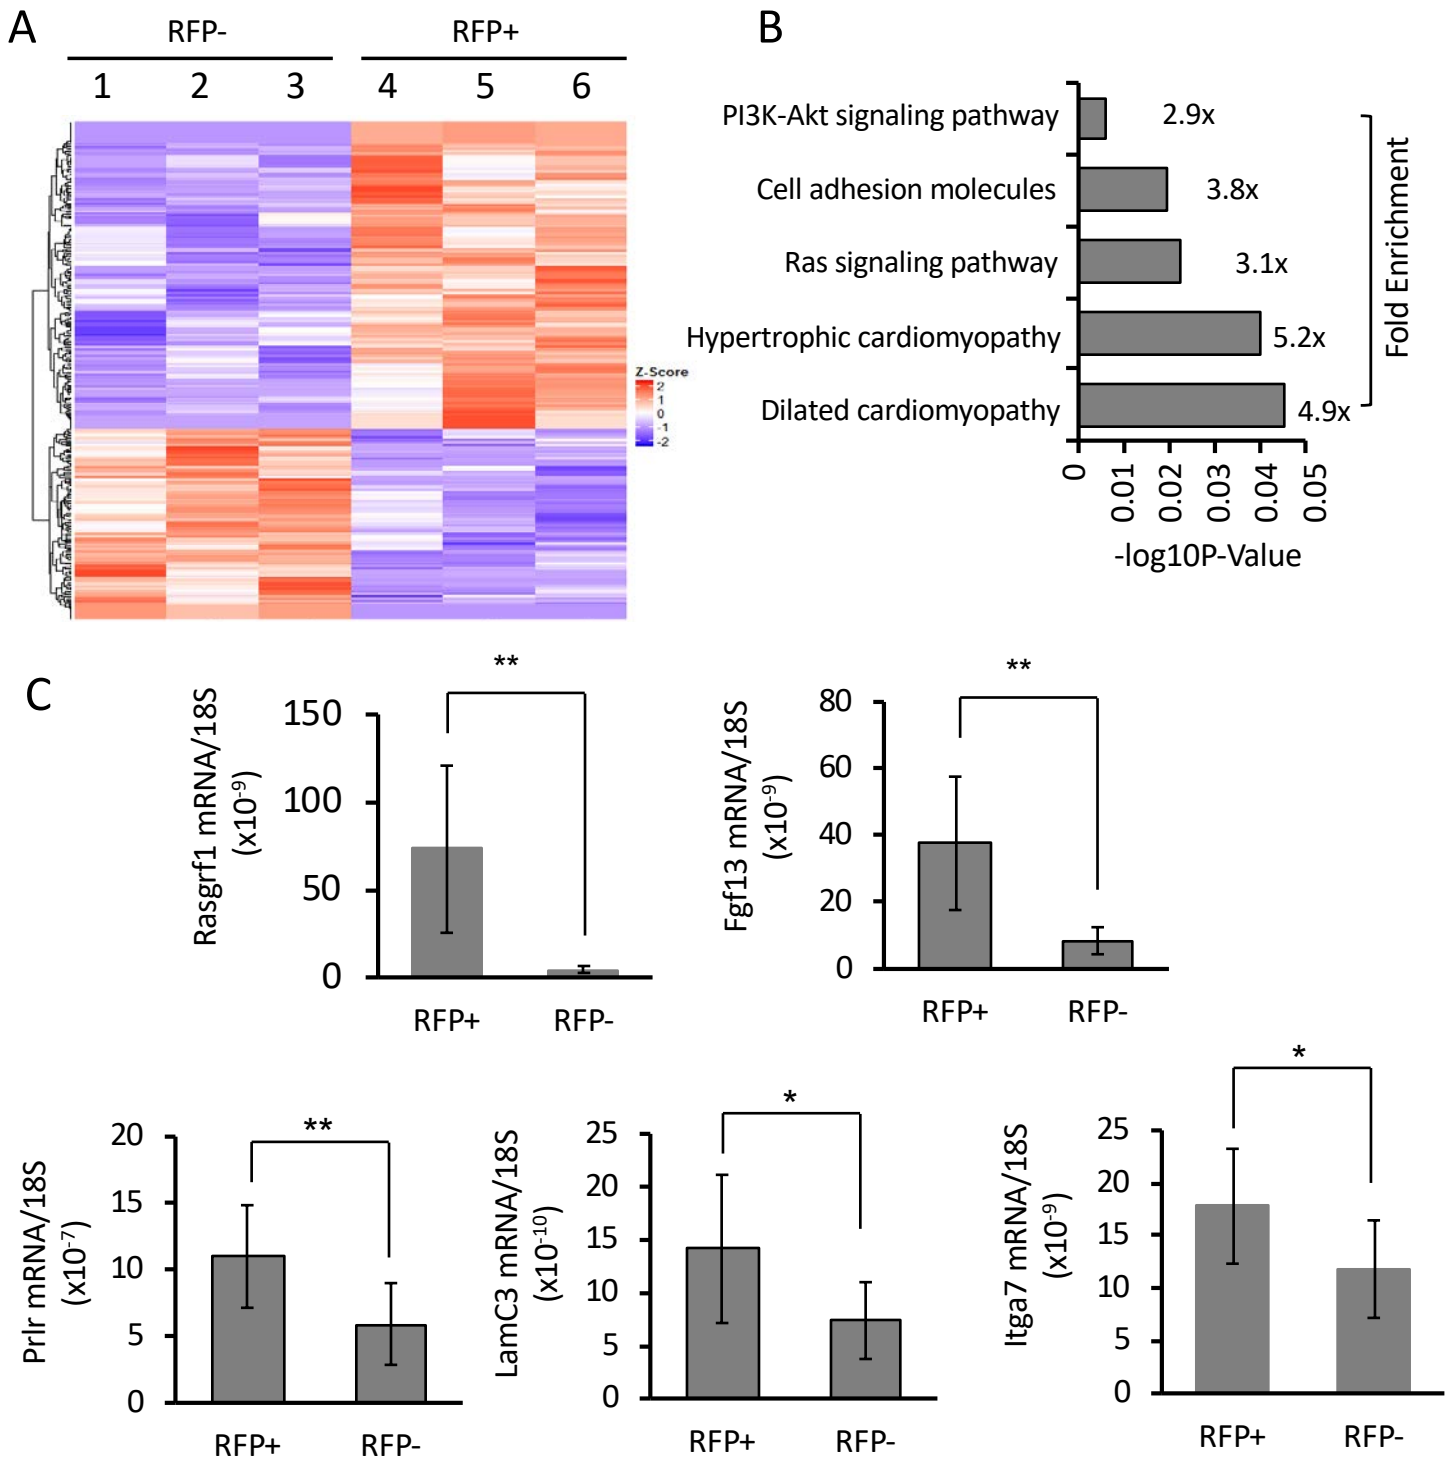

**Figure. S9. RNA-Seq analysis of ER $\alpha$ -RFP<sup>+</sup>ErbB2<sup>+</sup> and ER $\alpha$ -RFP-ErbB2<sup>+</sup> tumor cells. A.** The heatmap showing 230 upregulated and 143 downregulated mRNA transcripts identified by RNA-Seq profiling in ER $\alpha$ -RFP<sup>+</sup>ErbB2<sup>+</sup> (RFP+) cells versus ER $\alpha$ -RFP-ErbB2<sup>+</sup> (RFP-) cells. Six independent RNA samples isolated from purified cells of different tumors were analyzed. Data analysis is described in Supplementary Methods. Please see Supplementary Table S1 for entire gene list. **B.** KEGG pathways enriched with the differentially expressed genes. The top 5 significantly enriched pathways are shown. Pathway enrichment analysis was performed as described in Supplemental Methods with a cutoff p value of  $-\log_{10}P\text{-value} < 0.05$ . **C.** RT-qPCR assays of relative Rasgrf1, Fgf13, Prlr, LamC3, and Itga7 mRNA expression levels in ER $\alpha$ -RFP<sup>+</sup>ErbB2<sup>+</sup> (RFP+) and ER $\alpha$ -RFP-ErbB2<sup>+</sup> (RFP-) tumor cells. Three samples in each group and three replicates for each sample were assayed. Relative expression levels of these mRNAs were normalized to the expression levels of the endogenous 18S rRNA. \*,  $p < 0.05$ , and \*\*,  $p < 0.01$  by two-tailed Student's t test.

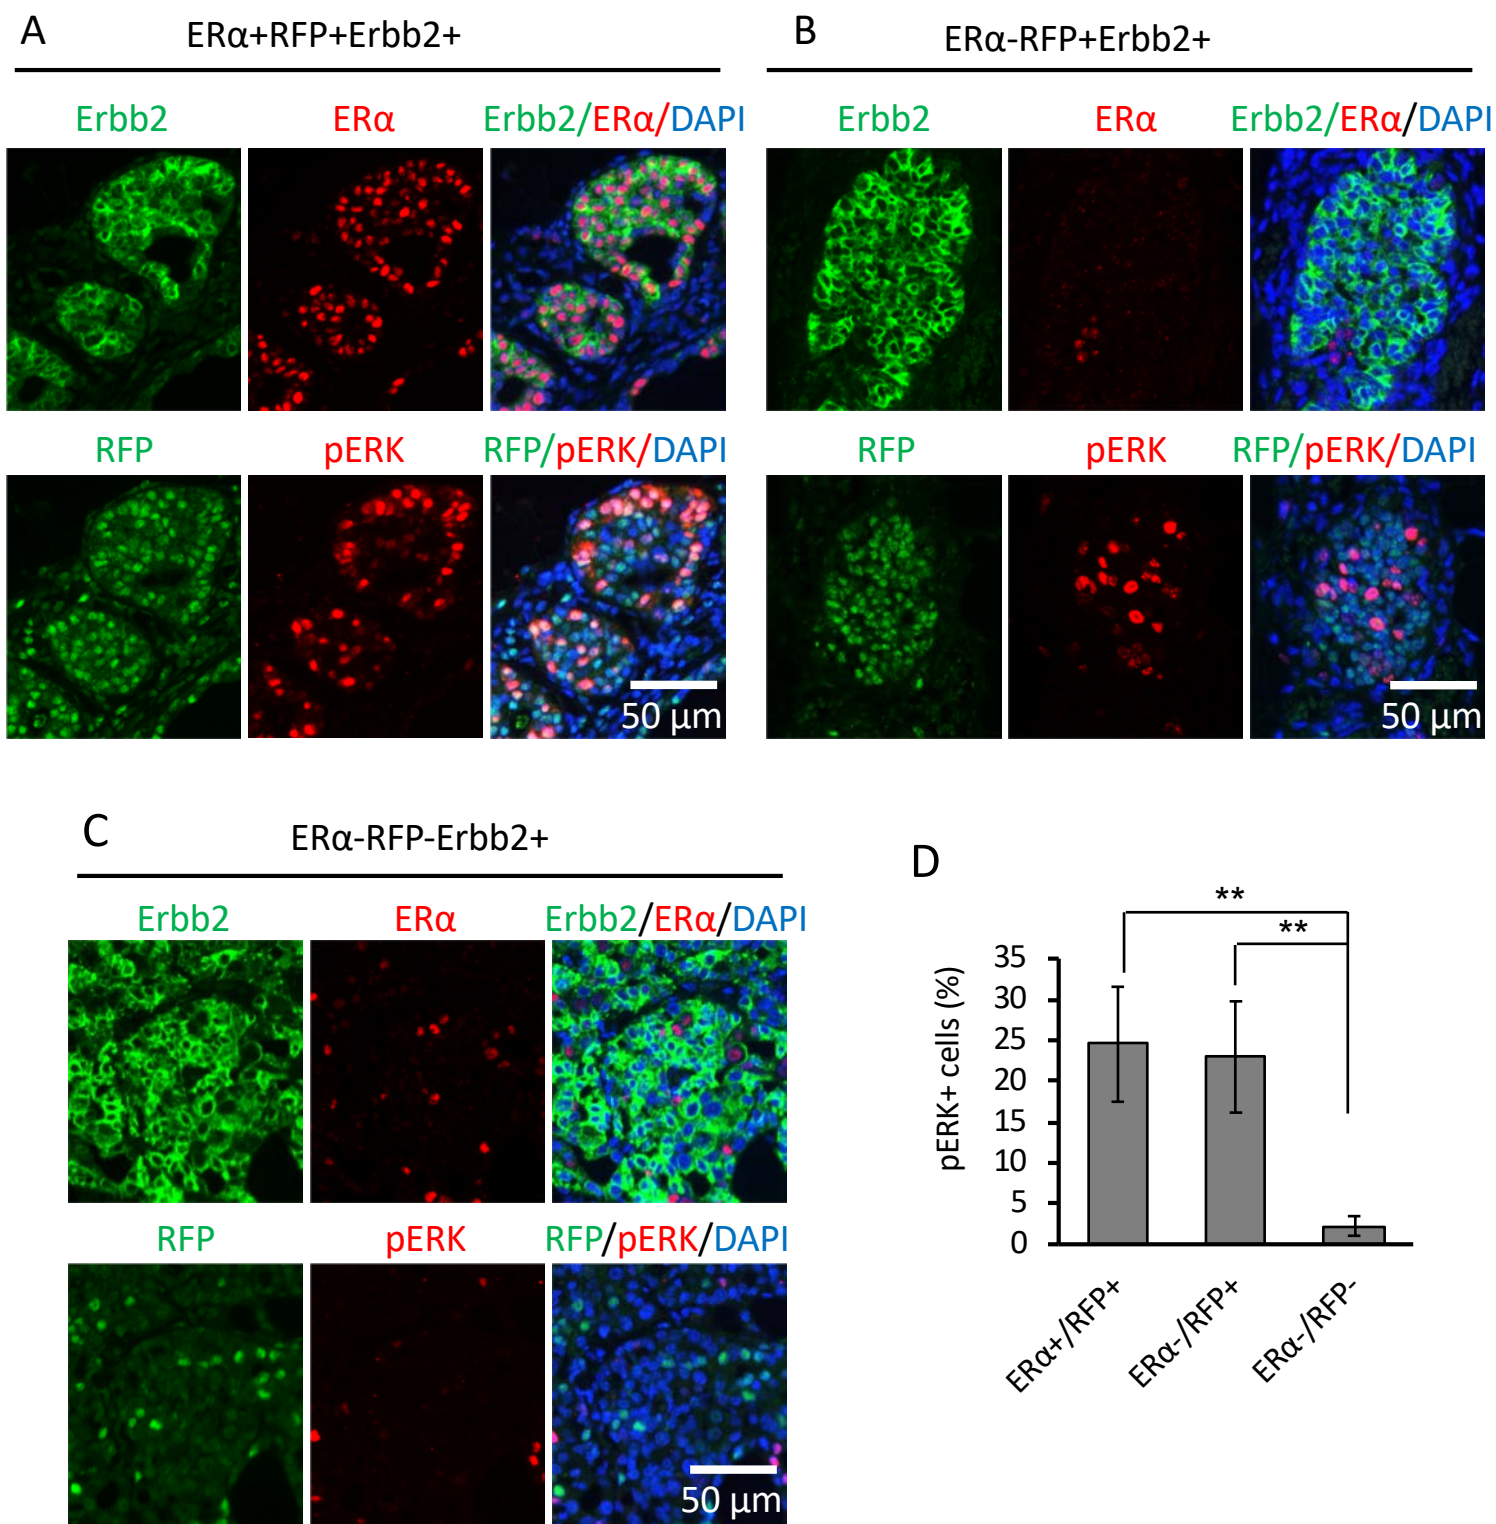

**Figure. S10. pERK1/2 is highly expressed in ER $\alpha$ +RFP+Erb2+ and ER $\alpha$ -RFP+Erb2+ tumor cells of 13-week tumors. A-C.** At week 13 after viral infection, mammary glands were collected and sectioned. Adjacent sections were used for double IF staining for Erb2/ER $\alpha$  (Panels A & B) and RFP/p-ERK1/2 (Panel C). Erb2+ staining identifies tumor cells. ER $\alpha$  staining reflects ER $\alpha$  expression status in tumor cells. In Panel A, ER $\alpha$ + and RFP+ tumor cells are colocalized in the same cell cluster, and most of these cells have high p-ERK1/2 staining signal. In Panel B, most Erb2+ tumor cells are RFP+ but ER $\alpha$ - cells, and many RFP+ cells have high p-ERK1/2 staining signal. In Panel C, most Erb2+ tumor cells are ER $\alpha$ - and RFP- cells, and the majority of these cells do not have detectable p-ERK1/2 staining signal. **D.** The percentages of p-ERK1/2+ cells in each of the indicated cell populations. The p-ERK1/2+ cells out of 6308 ER $\alpha$ +RFP+/Erb2+ cells, 5987 ER $\alpha$ -RFP+Erb2+ cells, and 6220 ER $\alpha$ -RFP-Erb2+ cells from 6 independent samples were examined and counted. \*\*,  $p < 0.01$  by two-tailed Student's test.

A

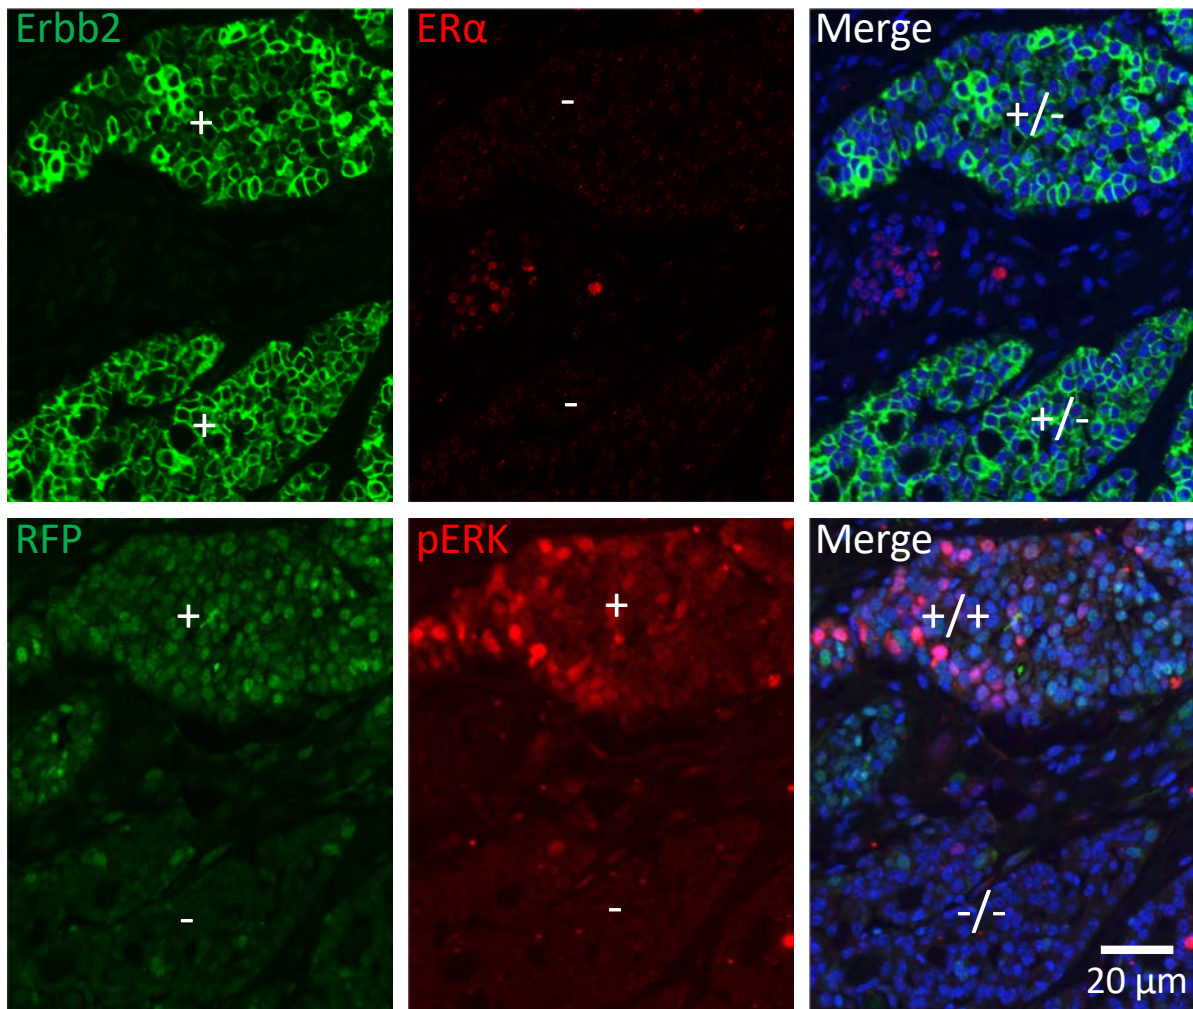

B

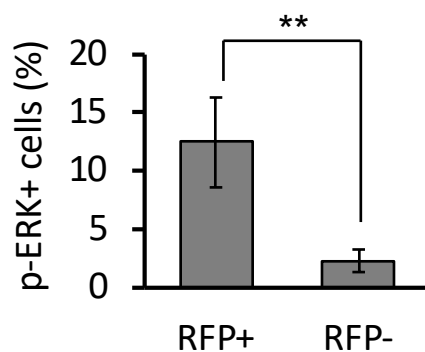

**Figure. S11. p-ERK1/2 is highly expressed in ER $\alpha$ :RFP<sup>+</sup>ErbB2<sup>+</sup> tumor cells in advanced large tumors.**

**A.** At week 27 after viral infection, tumor tissues (1 cm  $\times$  1 cm  $\times$  0.3 cm) were collected from different regions of each tumor. Adjacent sections prepared from 27-week tumors were used for double IF staining of ErbB2 and ER $\alpha$  (upper panels) and RFP and p-ERK1/2 (lower panels). In each panel, the upper region contains ErbB2<sup>+</sup>, ER $\alpha$ <sup>-</sup>, RFP<sup>+</sup> and p-ERK1/2<sup>+</sup> cells, while the lower region contains mostly ErbB2<sup>+</sup>, ER $\alpha$ <sup>-</sup>, RFP<sup>-</sup> and p-ERK1/2<sup>-</sup> cells. **B.** The percentages of p-ERK1/2<sup>+</sup> cells in ER $\alpha$ :RFP<sup>+</sup>ErbB2<sup>+</sup> (RFP<sup>+</sup>) and ER $\alpha$ :RFP<sup>-</sup>ErbB2<sup>+</sup> (RFP<sup>-</sup>) cells. Sections prepared from six tumors were assayed. The numbers of p-ERK1/2<sup>+</sup> cells out of 32678 ER $\alpha$ :RFP<sup>+</sup>ErbB2<sup>+</sup> (RFP<sup>+</sup>) tumor cells and 72221 ER $\alpha$ :RFP<sup>-</sup>ErbB2<sup>+</sup> (RFP<sup>-</sup>) tumor cells were counted. \*\*,  $p < 0.01$  by two-tailed Student's t test.

**Table S1. Differentially expressed transcripts in ER-RFP+Erb2+ and ER-RFP-Erb2+ tumor cells.**

Expressed genes were determined using DESeq2. The cut off thresholds for differentially expressed transcriptions are  $p < 0.05$  and  $p$ -adjusted (FDR, corrected for multiple hypotheses testing)  $< 0.1$ . TMP means " transcripts per million RNA molecules".

| Gene ID      | Gene Symbol   | RNA samples of ER-RFP-Erb2+ Cells |          | RNA samples of ER-RFP+Erb2+ Cells |          | Average  | Average  | Fold Change | ER-RFP+Erb2+ vs. ER-RFP-Erb2+ | P-value |             |
|--------------|---------------|-----------------------------------|----------|-----------------------------------|----------|----------|----------|-------------|-------------------------------|---------|-------------|
|              |               | Sample 1                          | Sample 2 | Sample 3                          | Sample 4 | Sample 5 | Sample 6 | Samples 1-3 |                               |         | Samples 4-6 |
| NM_177567    | BC049762      | 0.0000                            | 0.0000   | 0.0000                            | 0.1361   | 0.1479   | 0.1378   | 0.0000      | 0.1406                        | #DIV/0! | 0.0000      |
| NR_029585    | Mir199a-1     | 0.0000                            | 0.0000   | 0.0000                            | 1.7164   | 1.8658   | 1.7384   | 0.0000      | 1.7736                        | #DIV/0! | 0.0000      |
| NM_001164437 | Tmem212       | 0.0000                            | 0.0000   | 0.0000                            | 0.1676   | 0.1822   | 0.1697   | 0.0000      | 0.1732                        | #DIV/0! | 0.0000      |
| NM_008455    | Klkb1         | 0.0000                            | 0.0000   | 0.0000                            | 0.0488   | 0.0530   | 0.0494   | 0.0000      | 0.0504                        | #DIV/0! | 0.0000      |
| NM_146101    | Habp2         | 0.0000                            | 0.0000   | 0.0000                            | 0.0582   | 0.0632   | 0.0589   | 0.0000      | 0.0601                        | #DIV/0! | 0.0000      |
| NM_001271578 | Sec1          | 0.0000                            | 0.0000   | 0.0000                            | 0.0973   | 0.1058   | 0.0985   | 0.0000      | 0.1005                        | #DIV/0! | 0.0000      |
| NR_015587    | 9330111N05Rik | 0.0000                            | 0.0000   | 0.0000                            | 0.0854   | 0.0928   | 0.0865   | 0.0000      | 0.0882                        | #DIV/0! | 0.0000      |
| NR_040754    | 4930546K05Rik | 0.0000                            | 0.0000   | 0.0000                            | 0.0340   | 0.0369   | 0.0344   | 0.0000      | 0.0351                        | #DIV/0! | 0.0000      |
| NR_104382    | Abcg8         | 0.0000                            | 0.0000   | 0.0000                            | 0.0396   | 0.0431   | 0.0401   | 0.0000      | 0.0410                        | #DIV/0! | 0.0000      |
| NM_001286005 | Abcg8         | 0.0000                            | 0.0000   | 0.0000                            | 0.0352   | 0.0382   | 0.0356   | 0.0000      | 0.0364                        | #DIV/0! | 0.0000      |
| NM_183281    | 2310005G13Rik | 0.0000                            | 0.0000   | 0.0000                            | 0.0392   | 0.0426   | 0.0397   | 0.0000      | 0.0405                        | #DIV/0! | 0.0000      |
| NM_011036    | Reg3b         | 0.0000                            | 0.0000   | 0.0000                            | 0.1583   | 0.1721   | 0.1603   | 0.0000      | 0.1636                        | #DIV/0! | 0.0000      |
| NR_024599    | Gm11346       | 0.0000                            | 0.0000   | 0.0000                            | 0.1078   | 0.1171   | 0.1091   | 0.0000      | 0.1113                        | #DIV/0! | 0.0000      |
| NM_007939    | Epha8         | 0.0000                            | 0.0000   | 0.0000                            | 0.0255   | 0.0277   | 0.0258   | 0.0000      | 0.0263                        | #DIV/0! | 0.0000      |
| NM_026180    | Abcg8         | 0.0000                            | 0.0000   | 0.0000                            | 0.0328   | 0.0356   | 0.0332   | 0.0000      | 0.0339                        | #DIV/0! | 0.0000      |
| NM_177923    | H2-M10.2      | 0.0000                            | 0.0000   | 0.0000                            | 0.1214   | 0.1319   | 0.1229   | 0.0000      | 0.1254                        | #DIV/0! | 0.0000      |
| NM_020284    | Ctsr          | 0.0000                            | 0.0000   | 0.0000                            | 0.1800   | 0.1957   | 0.2735   | 0.0000      | 0.2164                        | #DIV/0! | 0.0017      |
| NR_028572    | Snora43       | 0.0000                            | 0.0000   | 0.0000                            | 1.7288   | 0.9396   | 1.7509   | 0.0000      | 1.4731                        | #DIV/0! | 0.0053      |
| NM_001081428 | Fam184a       | 0.0000                            | 0.0000   | 0.0000                            | 0.0304   | 0.0661   | 0.0616   | 0.0000      | 0.0527                        | #DIV/0! | 0.0093      |
| NM_001037919 | Gm6460        | 0.0000                            | 0.0000   | 0.0000                            | 0.5854   | 0.3182   | 0.2964   | 0.0000      | 0.4000                        | #DIV/0! | 0.0126      |
| NM_178915    | Tmem179       | 0.0000                            | 0.0000   | 0.0000                            | 0.0506   | 0.0550   | 0.1026   | 0.0000      | 0.0694                        | #DIV/0! | 0.0140      |
| NM_008574    | Smcp          | 0.0000                            | 0.0000   | 0.0000                            | 0.1352   | 0.1469   | 0.2738   | 0.0000      | 0.1853                        | #DIV/0! | 0.0140      |
| NM_010856    | Myh6          | 0.0000                            | 0.0000   | 0.0000                            | 0.0200   | 0.0217   | 0.0405   | 0.0000      | 0.0274                        | #DIV/0! | 0.0140      |
| NM_001164171 | Myh6          | 0.0000                            | 0.0000   | 0.0000                            | 0.0198   | 0.0215   | 0.0400   | 0.0000      | 0.0271                        | #DIV/0! | 0.0140      |
| NR_040626    | 9230105E05Rik | 0.0000                            | 0.0000   | 0.0000                            | 0.0534   | 0.1161   | 0.0541   | 0.0000      | 0.0745                        | #DIV/0! | 0.0231      |
| NM_008011    | Fgfr4         | 0.0000                            | 0.0000   | 0.0000                            | 0.0382   | 0.0830   | 0.0387   | 0.0000      | 0.0533                        | #DIV/0! | 0.0231      |
| NM_001093776 | Myt1l         | 0.0000                            | 0.0000   | 0.0000                            | 0.0169   | 0.0368   | 0.0171   | 0.0000      | 0.0236                        | #DIV/0! | 0.0231      |
| NM_001093778 | Myt1l         | 0.0000                            | 0.0000   | 0.0000                            | 0.0167   | 0.0363   | 0.0169   | 0.0000      | 0.0233                        | #DIV/0! | 0.0231      |
| NM_008174    | Grm8          | 0.0000                            | 0.0000   | 0.0000                            | 0.0653   | 0.1420   | 0.0662   | 0.0000      | 0.0912                        | #DIV/0! | 0.0231      |
| NM_026296    | 4930548H24Rik | 0.0000                            | 0.0000   | 0.0000                            | 0.0842   | 0.1830   | 0.0853   | 0.0000      | 0.1175                        | #DIV/0! | 0.0231      |
| NM_008666    | Myt1l         | 0.0000                            | 0.0000   | 0.0000                            | 0.0167   | 0.0363   | 0.0169   | 0.0000      | 0.0233                        | #DIV/0! | 0.0231      |
| NR_033522    | 1600029O15Rik | 0.0000                            | 0.0000   | 0.0000                            | 0.0664   | 0.1444   | 0.0673   | 0.0000      | 0.0927                        | #DIV/0! | 0.0231      |
| NM_001093775 | Myt1l         | 0.0000                            | 0.0000   | 0.0000                            | 0.0167   | 0.0363   | 0.0169   | 0.0000      | 0.0233                        | #DIV/0! | 0.0231      |
| NR_033217    | BC030870      | 0.0000                            | 0.0000   | 0.0000                            | 0.4874   | 1.1480   | 0.5760   | 0.0000      | 0.7371                        | #DIV/0! | 0.0236      |
| NM_001162537 | 9330159F19Rik | 0.0000                            | 0.0000   | 0.0000                            | 0.0639   | 0.0694   | 0.0216   | 0.0000      | 0.0516                        | #DIV/0! | 0.0269      |
| NM_008241    | Foxg1         | 0.0000                            | 0.0000   | 0.0000                            | 0.6523   | 0.3545   | 0.2065   | 0.0000      | 0.4044                        | #DIV/0! | 0.0368      |
| NM_001160112 | Foxg1         | 0.0000                            | 0.0000   | 0.0000                            | 0.4824   | 0.2622   | 0.1527   | 0.0000      | 0.2991                        | #DIV/0! | 0.0368      |
| NM_013601    | Msx2          | 0.0000                            | 0.0532   | 0.0639                            | 0.2223   | 0.6041   | 0.5629   | 0.0390      | 0.4631                        | 11.8669 | 0.0258      |
| NM_175138    | Dnaic1        | 0.0000                            | 0.0000   | 0.0554                            | 0.1929   | 0.3146   | 0.1466   | 0.0185      | 0.2180                        | 11.7999 | 0.0202      |
| NM_007911    | Efnb3         | 0.0000                            | 0.0000   | 0.0429                            | 0.1495   | 0.1625   | 0.1136   | 0.0143      | 0.1418                        | 9.9081  | 0.0034      |
| NM_001205235 | Nrxn2         | 0.0000                            | 0.0190   | 0.0000                            | 0.0397   | 0.0647   | 0.0803   | 0.0063      | 0.0615                        | 9.7272  | 0.0147      |
| NM_020253    | Nrxn2         | 0.0000                            | 0.0189   | 0.0000                            | 0.0395   | 0.0644   | 0.0800   | 0.0063      | 0.0613                        | 9.7272  | 0.0147      |
| NM_001205234 | Nrxn2         | 0.0000                            | 0.0173   | 0.0000                            | 0.0361   | 0.0588   | 0.0731   | 0.0058      | 0.0560                        | 9.7272  | 0.0147      |
| NM_022030    | Sv2a          | 0.0000                            | 0.0294   | 0.0000                            | 0.0613   | 0.1334   | 0.0621   | 0.0098      | 0.0856                        | 8.7468  | 0.0425      |
| NM_013777    | Akr1c12       | 0.1176                            | 0.0000   | 0.0000                            | 0.3904   | 0.4244   | 0.1977   | 0.0392      | 0.3375                        | 8.6075  | 0.0209      |
| NM_010200    | Fgf13         | 0.0580                            | 0.0921   | 0.1106                            | 0.4329   | 0.9411   | 0.8282   | 0.0869      | 0.7341                        | 8.4499  | 0.0139      |
| NM_001039655 | Rasgrf1       | 0.0000                            | 0.0000   | 0.1381                            | 0.2403   | 0.5224   | 0.3651   | 0.0460      | 0.3759                        | 8.1678  | 0.0244      |
| NM_001290415 | Fgf13         | 0.0719                            | 0.1142   | 0.1371                            | 0.4773   | 1.1024   | 0.9668   | 0.1077      | 0.8488                        | 7.8778  | 0.0178      |
| NM_001166464 | Spock1        | 0.0000                            | 0.0733   | 0.0879                            | 0.5740   | 0.3328   | 0.3488   | 0.0537      | 0.4185                        | 7.7879  | 0.0115      |
| NM_001166465 | Spock1        | 0.0000                            | 0.0735   | 0.0882                            | 0.5756   | 0.3337   | 0.3498   | 0.0539      | 0.4197                        | 7.7879  | 0.0115      |
| NM_001146295 | Celf4         | 0.0000                            | 0.0509   | 0.0612                            | 0.1596   | 0.4049   | 0.2156   | 0.0374      | 0.2600                        | 6.9594  | 0.0438      |
| NM_018777    | Cldn6         | 0.4808                            | 1.6039   | 0.2751                            | 2.6328   | 7.3715   | 6.3835   | 0.7866      | 5.4626                        | 6.9447  | 0.0357      |
| NM_001290414 | Fgf13         | 0.0579                            | 0.1379   | 0.1103                            | 0.4320   | 0.8871   | 0.7779   | 0.1020      | 0.6990                        | 6.8518  | 0.0127      |
| NM_153576    | Cxcl17        | 0.0000                            | 0.3027   | 0.1817                            | 0.6324   | 1.3748   | 1.2810   | 0.1615      | 1.0960                        | 6.7883  | 0.0200      |
| NR_004417    | Snord73a      | 2.1295                            | 3.3831   | 0.0000                            | 7.0677   | 17.2861  | 12.5270  | 1.8375      | 12.2936                       | 6.6903  | 0.0283      |

|              |               |         |         |         |         |         |         |         |         |        |        |
|--------------|---------------|---------|---------|---------|---------|---------|---------|---------|---------|--------|--------|
| NM_016867    | Gipc2         | 1.8330  | 1.0920  | 1.0924  | 3.7072  | 12.6060 | 10.4939 | 1.3391  | 8.9357  | 6.6728 | 0.0479 |
| NR_106038    | Mir7070       | 0.0000  | 2.6750  | 0.0000  | 5.5884  | 4.5560  | 7.0751  | 0.8917  | 5.7398  | 6.4371 | 0.0136 |
| NM_001164631 | Mum1l1        | 0.3809  | 0.4676  | 0.4622  | 1.3216  | 3.9350  | 3.1136  | 0.4369  | 2.7901  | 6.3860 | 0.0381 |
| NM_001164633 | Mum1l1        | 0.3720  | 0.4567  | 0.4514  | 1.2907  | 3.8432  | 3.0409  | 0.4267  | 2.7249  | 6.3860 | 0.0381 |
| NM_001164632 | Mum1l1        | 0.3668  | 0.4503  | 0.4451  | 1.2726  | 3.7892  | 2.9981  | 0.4207  | 2.6866  | 6.3860 | 0.0381 |
| NM_001164630 | Mum1l1        | 0.3778  | 0.4501  | 0.4503  | 1.3843  | 3.7194  | 2.9365  | 0.4260  | 2.6801  | 6.2907 | 0.0304 |
| NM_175541    | Mum1l1        | 0.3842  | 0.4578  | 0.4579  | 1.4079  | 3.7828  | 2.9864  | 0.4333  | 2.7257  | 6.2907 | 0.0304 |
| NR_110348    | Sytl2         | 0.0619  | 0.2457  | 0.1180  | 0.4106  | 1.0600  | 1.0916  | 0.1418  | 0.8541  | 6.0218 | 0.0356 |
| NM_178739    | Dcaf12l1      | 0.0000  | 0.0328  | 0.0393  | 0.1368  | 0.1116  | 0.1733  | 0.0240  | 0.1406  | 5.8508 | 0.0058 |
| NM_001190718 | Dcaf12l1      | 0.0000  | 0.0329  | 0.0395  | 0.1374  | 0.1120  | 0.1739  | 0.0241  | 0.1411  | 5.8508 | 0.0058 |
| NM_011084    | Pik3c2g       | 0.0000  | 0.0324  | 0.0389  | 0.1693  | 0.0736  | 0.1715  | 0.0238  | 0.1381  | 5.8095 | 0.0294 |
| NM_207683    | Pik3c2g       | 0.0000  | 0.0261  | 0.0313  | 0.1363  | 0.0593  | 0.1380  | 0.0191  | 0.1112  | 5.8095 | 0.0294 |
| NM_183278    | Fam25c        | 2.7619  | 0.9403  | 1.8812  | 7.8573  | 11.7439 | 12.6002 | 1.8611  | 10.7338 | 5.7673 | 0.0046 |
| NM_011245    | Rasgrf1       | 0.0000  | 0.0272  | 0.0653  | 0.1137  | 0.2162  | 0.2015  | 0.0308  | 0.1771  | 5.7433 | 0.0171 |
| NM_001301164 | Car7          | 0.0745  | 0.1184  | 0.0000  | 0.1855  | 0.5378  | 0.3758  | 0.0643  | 0.3663  | 5.6967 | 0.0483 |
| NR_028385    | Gm10190       | 0.0000  | 0.0682  | 0.0000  | 0.0713  | 0.1549  | 0.1444  | 0.0227  | 0.1235  | 5.4313 | 0.0442 |
| NM_028589    | 1700125H20Rik | 0.1485  | 0.1180  | 0.0000  | 0.2465  | 0.5358  | 0.6241  | 0.0888  | 0.4688  | 5.2772 | 0.0363 |
| NM_028629    | Kprp          | 0.1061  | 0.0000  | 0.1012  | 0.3962  | 0.1914  | 0.4459  | 0.0691  | 0.3445  | 4.9856 | 0.0319 |
| NR_002865    | Rnu11         | 0.0000  | 1.0651  | 1.2785  | 4.4500  | 3.6279  | 3.3803  | 0.7812  | 3.8194  | 4.8893 | 0.0040 |
| NM_001033499 | Sh2d1b2       | 0.0000  | 0.2883  | 0.3461  | 1.5056  | 0.6547  | 0.9150  | 0.2114  | 1.0251  | 4.8479 | 0.0410 |
| NM_053105    | Klhl1         | 0.0000  | 0.1421  | 0.0341  | 0.3562  | 0.2581  | 0.2104  | 0.0587  | 0.2749  | 4.6810 | 0.0235 |
| NM_001166466 | Spock1        | 0.0930  | 0.1724  | 0.2660  | 0.9775  | 0.8388  | 0.6253  | 0.1771  | 0.8139  | 4.5943 | 0.0050 |
| NM_009262    | Spock1        | 0.0929  | 0.1723  | 0.2659  | 0.9768  | 0.8383  | 0.6249  | 0.1770  | 0.8133  | 4.5943 | 0.0050 |
| NM_001166463 | Spock1        | 0.0931  | 0.1726  | 0.2664  | 0.9787  | 0.8399  | 0.6261  | 0.1774  | 0.8149  | 4.5943 | 0.0050 |
| NM_133862    | Fgg           | 0.6656  | 6.5707  | 6.6184  | 11.3603 | 30.1860 | 21.8932 | 4.6182  | 21.1465 | 4.5789 | 0.0463 |
| NM_011855    | Tenm1         | 0.0520  | 0.0550  | 0.0000  | 0.1581  | 0.1875  | 0.1310  | 0.0357  | 0.1588  | 4.4540 | 0.0070 |
| NM_001005424 | Gm996         | 0.0000  | 0.0491  | 0.0000  | 0.0513  | 0.0837  | 0.0779  | 0.0164  | 0.0710  | 4.3346 | 0.0465 |
| NM_013519    | Foxc2         | 0.7442  | 0.4223  | 0.9631  | 3.5287  | 2.3973  | 3.0378  | 0.7099  | 2.9879  | 4.2091 | 0.0033 |
| NM_018857    | Msln          | 13.7616 | 12.9438 | 12.9918 | 79.9868 | 33.9638 | 45.9722 | 13.2324 | 53.3076 | 4.0286 | 0.0438 |
| NM_023047    | Dpysl5        | 0.0288  | 0.1833  | 0.0550  | 0.2632  | 0.4162  | 0.3151  | 0.0890  | 0.3315  | 3.7231 | 0.0208 |
| NM_020013    | Fgf21         | 0.0000  | 0.2429  | 0.1458  | 0.5075  | 0.5517  | 0.3855  | 0.1296  | 0.4816  | 3.7163 | 0.0151 |
| NR_001277    | Snord33       | 3.5318  | 5.6110  | 0.0000  | 8.7915  | 9.5565  | 14.8404 | 3.0476  | 11.0628 | 3.6300 | 0.0331 |
| NM_023557    | Slc44a4       | 0.0000  | 0.2943  | 0.1766  | 0.4099  | 0.6127  | 0.6227  | 0.1570  | 0.5484  | 3.4935 | 0.0237 |
| NM_008024    | Foxl1         | 0.1957  | 0.0000  | 0.0466  | 0.3247  | 0.3089  | 0.2056  | 0.0808  | 0.2797  | 3.4629 | 0.0465 |
| NM_008272    | Hoxc9         | 0.0842  | 0.1338  | 0.1607  | 0.5592  | 0.4559  | 0.2832  | 0.1262  | 0.4327  | 3.4279 | 0.0214 |
| NR_106037    | Mir7069       | 0.0000  | 1.8553  | 2.2271  | 3.8758  | 4.2131  | 5.8883  | 1.3608  | 4.6591  | 3.4238 | 0.0237 |
| NM_175350    | Catsperd      | 0.0000  | 0.0448  | 0.0538  | 0.1405  | 0.1018  | 0.0949  | 0.0329  | 0.1124  | 3.4177 | 0.0221 |
| NM_178621    | Phyhipl       | 0.3528  | 0.4804  | 0.7690  | 2.5092  | 1.2274  | 1.6096  | 0.5341  | 1.7821  | 3.3367 | 0.0354 |
| NM_001162846 | Phyhipl       | 0.3722  | 0.5069  | 0.8113  | 2.6475  | 1.2950  | 1.6982  | 0.5635  | 1.8802  | 3.3367 | 0.0354 |
| NM_001159647 | Cntn1         | 0.1245  | 0.1780  | 0.0949  | 0.5370  | 0.2470  | 0.4812  | 0.1325  | 0.4217  | 3.1838 | 0.0348 |
| NM_007727    | Cntn1         | 0.1266  | 0.1810  | 0.0966  | 0.5461  | 0.2512  | 0.4893  | 0.1347  | 0.4289  | 3.1838 | 0.0348 |
| NM_001159648 | Cntn1         | 0.1277  | 0.1825  | 0.0974  | 0.5509  | 0.2533  | 0.4935  | 0.1359  | 0.4326  | 3.1838 | 0.0348 |
| NM_001253782 | Prlr          | 1.2078  | 3.9444  | 5.6307  | 7.3493  | 13.1938 | 11.9548 | 3.5943  | 10.8326 | 3.0139 | 0.0300 |
| NM_001253781 | Prlr          | 0.3328  | 1.2337  | 1.8335  | 2.2091  | 4.3357  | 3.6980  | 1.1333  | 3.4143  | 3.0126 | 0.0409 |
| NR_028480    | Gm12238       | 1.1678  | 0.9276  | 0.0000  | 1.9379  | 2.1066  | 1.9628  | 0.6985  | 2.0024  | 2.8669 | 0.0223 |
| NM_177781    | Trpa1         | 0.0000  | 0.0270  | 0.0648  | 0.0846  | 0.0919  | 0.0856  | 0.0306  | 0.0874  | 2.8563 | 0.0399 |
| NM_009406    | Tnni3         | 0.0000  | 0.4188  | 0.3351  | 0.7291  | 0.7925  | 0.5907  | 0.2513  | 0.7041  | 2.8018 | 0.0326 |
| NM_001024698 | Cpa2          | 0.3279  | 0.0000  | 0.2084  | 0.4534  | 0.4929  | 0.5511  | 0.1788  | 0.4991  | 2.7920 | 0.0327 |
| NM_001159568 | Meis2         | 0.7487  | 0.1982  | 0.3867  | 1.5530  | 0.7878  | 1.3632  | 0.4445  | 1.2347  | 2.7775 | 0.0483 |
| NM_001136072 | Meis2         | 0.7369  | 0.1951  | 0.3806  | 1.5286  | 0.7754  | 1.3418  | 0.4376  | 1.2153  | 2.7775 | 0.0483 |
| NM_010825    | Meis2         | 0.7521  | 0.1991  | 0.3884  | 1.5601  | 0.7914  | 1.3694  | 0.4466  | 1.2403  | 2.7775 | 0.0483 |
| NM_001159567 | Meis2         | 0.7337  | 0.1943  | 0.3789  | 1.5219  | 0.7720  | 1.3359  | 0.4356  | 1.2099  | 2.7775 | 0.0483 |
| NM_013724    | Nrk           | 1.3160  | 0.4878  | 0.7320  | 2.7663  | 1.8991  | 2.3778  | 0.8453  | 2.3477  | 2.7774 | 0.0129 |
| NM_007933    | Eno3          | 12.3703 | 4.3351  | 5.5509  | 23.9999 | 15.9976 | 21.7851 | 7.4188  | 20.5942 | 2.7760 | 0.0189 |
| NM_001276285 | Eno3          | 13.1994 | 4.6257  | 5.9230  | 25.6085 | 17.0698 | 23.2453 | 7.9160  | 21.9745 | 2.7760 | 0.0189 |
| NM_001136062 | Eno3          | 13.3064 | 4.6632  | 5.9710  | 25.8161 | 17.2082 | 23.4337 | 7.9802  | 22.1527 | 2.7760 | 0.0189 |
| NM_001159570 | Meis2         | 0.6676  | 0.1614  | 0.3875  | 1.3968  | 0.7330  | 1.1952  | 0.4055  | 1.1083  | 2.7334 | 0.0455 |
| NM_001159569 | Meis2         | 0.6648  | 0.1607  | 0.3858  | 1.3910  | 0.7299  | 1.1902  | 0.4038  | 1.1037  | 2.7334 | 0.0455 |
| NM_011324    | Scnn1a        | 0.5796  | 0.7234  | 0.3158  | 0.8931  | 1.7922  | 1.7394  | 0.5396  | 1.4749  | 2.7334 | 0.0411 |
| NR_024325    | 9130024F11Rik | 0.1554  | 0.0926  | 0.1111  | 0.2578  | 0.3153  | 0.3917  | 0.1197  | 0.3216  | 2.6872 | 0.0093 |
| NM_011542    | Tcea3         | 0.1161  | 0.3690  | 0.4429  | 0.7708  | 0.9426  | 0.6831  | 0.3093  | 0.7988  | 2.5825 | 0.0173 |
| NM_001195760 | S100a2        | 3.6776  | 2.1910  | 0.4383  | 6.1029  | 4.1462  | 5.7948  | 2.1023  | 5.3480  | 2.5439 | 0.0437 |
| NM_001289498 | Egflam        | 0.3559  | 1.2485  | 1.2725  | 1.7962  | 2.9422  | 2.3675  | 0.9589  | 2.3686  | 2.4701 | 0.0345 |
| NM_001289496 | Egflam        | 0.3555  | 1.2472  | 1.2712  | 1.7944  | 2.9392  | 2.3651  | 0.9580  | 2.3662  | 2.4701 | 0.0345 |
| NM_178748    | Egflam        | 0.3572  | 1.2534  | 1.2775  | 1.8032  | 2.9537  | 2.3768  | 0.9627  | 2.3779  | 2.4701 | 0.0345 |



|              |               |         |         |         |          |         |          |         |          |        |        |
|--------------|---------------|---------|---------|---------|----------|---------|----------|---------|----------|--------|--------|
| NM_172922    | Ankk1         | 0.4852  | 0.2569  | 0.1028  | 0.6710   | 0.8266  | 0.5890   | 0.2817  | 0.6955   | 2.4694 | 0.0343 |
| NM_176957    | Nckap5        | 0.0000  | 0.1163  | 0.1397  | 0.2025   | 0.2202  | 0.2051   | 0.0853  | 0.2093   | 2.4525 | 0.0466 |
| NR_029741    | Mir24-2       | 1.3533  | 2.1500  | 6.4523  | 8.9832   | 8.5443  | 6.8238   | 3.3185  | 8.1171   | 2.4460 | 0.0489 |
| NR_002455    | Snord34       | 4.3880  | 5.2284  | 4.1842  | 10.9228  | 9.8944  | 12.9066  | 4.6002  | 11.2413  | 2.4436 | 0.0021 |
| NM_001201330 | 5730507C01Rik | 0.2848  | 0.0905  | 0.1086  | 0.3781   | 0.4624  | 0.3351   | 0.1613  | 0.3919   | 2.4292 | 0.0334 |
| NM_001033157 | 5730507C01Rik | 0.2931  | 0.0931  | 0.1118  | 0.3892   | 0.4759  | 0.3449   | 0.1660  | 0.4033   | 2.4292 | 0.0334 |
| NM_001159697 | Efcc1         | 0.2630  | 0.3343  | 0.1505  | 0.6110   | 0.6167  | 0.5746   | 0.2492  | 0.6008   | 2.4105 | 0.0031 |
| NR_038016    | Gm16998       | 0.7064  | 0.2806  | 0.4490  | 1.0745   | 1.1680  | 1.1872   | 0.4787  | 1.1433   | 2.3885 | 0.0067 |
| NR_040534    | Gm10548       | 0.0551  | 0.1313  | 0.0525  | 0.1371   | 0.1987  | 0.2314   | 0.0796  | 0.1891   | 2.3749 | 0.0444 |
| NM_201531    | Kcnf1         | 0.3024  | 0.1921  | 0.2595  | 0.6523   | 0.4636  | 0.6607   | 0.2513  | 0.5922   | 2.3562 | 0.0090 |
| NM_011430    | Sncg          | 63.5005 | 22.4709 | 45.0832 | 113.0926 | 78.1496 | 113.0463 | 43.6848 | 101.4295 | 2.3218 | 0.0255 |
| NM_023814    | Tbx18         | 0.1857  | 0.3196  | 0.1476  | 0.3338   | 0.6141  | 0.5202   | 0.2176  | 0.4894   | 2.2488 | 0.0494 |
| NM_001164524 | Serpinb9c     | 0.2270  | 0.4207  | 0.5050  | 0.8161   | 0.8188  | 0.9537   | 0.3842  | 0.8629   | 2.2458 | 0.0070 |
| NM_175140    | Chst8         | 0.2416  | 0.4319  | 0.4032  | 1.0025   | 0.6538  | 0.7615   | 0.3589  | 0.8060   | 2.2455 | 0.0198 |
| NR_028537    | Snord99       | 5.1716  | 6.1621  | 7.3971  | 15.0188  | 13.9935 | 13.0383  | 6.2436  | 14.0169  | 2.2450 | 0.0008 |
| NM_177914    | Dgkk          | 1.8665  | 2.2409  | 1.8405  | 4.3822   | 3.7688  | 5.1871   | 1.9826  | 4.4460   | 2.2425 | 0.0046 |
| NM_023755    | Tfcp2l1       | 0.2343  | 0.5708  | 0.7597  | 1.1147   | 1.2962  | 1.0896   | 0.5216  | 1.1668   | 2.2371 | 0.0180 |
| NR_027772    | Airm          | 0.7012  | 1.1141  | 1.0030  | 2.3274   | 1.8974  | 2.0626   | 0.9394  | 2.0958   | 2.2309 | 0.0028 |
| NM_001081328 | Chsy3         | 0.4476  | 0.6222  | 0.5335  | 1.2071   | 1.1775  | 1.1912   | 0.5345  | 1.1919   | 2.2302 | 0.0002 |
| NM_001081349 | Slc43a1       | 0.3422  | 0.2265  | 0.2175  | 0.5205   | 0.4630  | 0.7669   | 0.2621  | 0.5835   | 2.2262 | 0.0340 |
| NM_001039042 | Klk13         | 0.8411  | 0.3341  | 0.4010  | 0.9305   | 1.1379  | 1.4136   | 0.5254  | 1.1607   | 2.2092 | 0.0400 |
| NM_008985    | Ptpn          | 4.6288  | 2.6031  | 3.7498  | 5.6082   | 8.8672  | 9.7766   | 3.6606  | 8.0840   | 2.2084 | 0.0338 |
| NM_011453    | Serpinb9c     | 0.2305  | 0.4272  | 0.5128  | 0.7649   | 0.8314  | 0.9684   | 0.3901  | 0.8549   | 2.1914 | 0.0107 |
| NM_172855    | Galnt5        | 0.0446  | 0.1063  | 0.1276  | 0.1850   | 0.1609  | 0.2623   | 0.0928  | 0.2028   | 2.1845 | 0.0494 |
| NR_033304    | Lypd6         | 0.0396  | 0.0629  | 0.0377  | 0.0985   | 0.1071  | 0.0997   | 0.0467  | 0.1018   | 2.1783 | 0.0030 |
| NM_177139    | Lypd6         | 0.0414  | 0.0658  | 0.0395  | 0.1031   | 0.1121  | 0.1045   | 0.0489  | 0.1066   | 2.1783 | 0.0030 |
| NM_001085509 | Myom3         | 0.0260  | 0.0206  | 0.0248  | 0.0646   | 0.0468  | 0.0436   | 0.0238  | 0.0517   | 2.1740 | 0.0143 |
| NM_001163064 | AU041133      | 0.3299  | 0.3930  | 0.3670  | 0.6842   | 0.9917  | 0.6930   | 0.3633  | 0.7896   | 2.1737 | 0.0142 |
| NM_001282148 | Gm15816       | 0.0853  | 0.2033  | 0.0814  | 0.2832   | 0.2309  | 0.2868   | 0.1233  | 0.2670   | 2.1644 | 0.0308 |
| NR_028122    | 2310001K24Rik | 0.9464  | 0.7518  | 0.3008  | 1.3088   | 1.4227  | 1.5907   | 0.6664  | 1.4408   | 2.1622 | 0.0204 |
| NM_001171187 | Mal           | 11.2071 | 5.4208  | 7.6711  | 22.8793  | 13.2107 | 16.3187  | 8.0996  | 17.4696  | 2.1568 | 0.0473 |
| NM_010762    | Mal           | 10.5294 | 5.1757  | 7.2071  | 21.5821  | 12.4588 | 15.3318  | 7.6374  | 16.4576  | 2.1549 | 0.0472 |
| NM_024474    | Col26a1       | 0.1606  | 0.1276  | 0.1021  | 0.2221   | 0.3380  | 0.2699   | 0.1301  | 0.2767   | 2.1268 | 0.0176 |
| NR_035422    | Mir1191       | 6.0335  | 2.3964  | 8.6299  | 12.5157  | 13.6048 | 10.1409  | 5.6866  | 12.0871  | 2.1255 | 0.0369 |
| NM_027268    | Scm1          | 1.2223  | 0.5826  | 0.8547  | 2.2989   | 1.3965  | 1.9175   | 0.8865  | 1.8709   | 2.1104 | 0.0373 |
| NM_053141    | Pcdhb16       | 0.1649  | 0.1746  | 0.2620  | 0.5472   | 0.4213  | 0.3002   | 0.2005  | 0.4229   | 2.1092 | 0.0458 |
| NM_001083809 | Slc43a1       | 0.3506  | 0.2321  | 0.2229  | 0.5334   | 0.4217  | 0.7366   | 0.2685  | 0.5639   | 2.0998 | 0.0430 |
| NM_024497    | Slc43a1       | 0.3565  | 0.2360  | 0.2266  | 0.5423   | 0.4287  | 0.7490   | 0.2731  | 0.5734   | 2.0998 | 0.0430 |
| NM_030028    | Tmem190       | 0.9901  | 1.1798  | 2.1243  | 2.8754   | 2.6791  | 3.3283   | 1.4314  | 2.9609   | 2.0686 | 0.0187 |
| NM_053146    | Pcdhb21       | 0.0534  | 0.0848  | 0.1527  | 0.1772   | 0.1926  | 0.2244   | 0.0970  | 0.1981   | 2.0422 | 0.0357 |
| NM_007855    | Twist2        | 3.2007  | 3.2439  | 3.9992  | 6.9599   | 6.7692  | 7.5129   | 3.4813  | 7.0807   | 2.0339 | 0.0005 |
| NM_001256224 | Wnt5a         | 8.0339  | 3.2063  | 5.2182  | 9.2746   | 11.3068 | 12.6225  | 5.4861  | 11.0680  | 2.0174 | 0.0307 |
| NM_001159652 | Gpr62         | 0.3655  | 0.5226  | 0.1394  | 0.6672   | 0.7912  | 0.6143   | 0.3425  | 0.6909   | 2.0172 | 0.0472 |
| NR_028573    | Snora24       | 4.4555  | 2.6544  | 8.4972  | 10.1666  | 10.0466 | 11.2330  | 5.2024  | 10.4821  | 2.0149 | 0.0405 |
| NM_001286404 | Ghrl          | 0.5712  | 0.2269  | 0.5447  | 0.7110   | 1.0304  | 0.9601   | 0.4476  | 0.9005   | 2.0118 | 0.0370 |
| NM_009524    | Wnt5a         | 7.1837  | 2.8532  | 4.5984  | 8.2234   | 10.0189 | 11.1797  | 4.8784  | 9.8074   | 2.0104 | 0.0318 |
| NM_212487    | Krt78         | 0.2530  | 0.1675  | 0.1608  | 0.3849   | 0.4184  | 0.3544   | 0.1938  | 0.3859   | 1.9913 | 0.0053 |
| NM_178793    | Ccbe1         | 23.4784 | 13.4818 | 13.2260 | 37.2881  | 28.2730 | 34.0362  | 16.7287 | 33.1991  | 1.9846 | 0.0184 |
| NM_016719    | Grb14         | 9.2162  | 3.8654  | 4.7104  | 13.1529  | 9.7755  | 12.2682  | 5.9307  | 11.7322  | 1.9782 | 0.0406 |
| NM_198052    | Tbx3          | 1.7278  | 1.0836  | 1.1562  | 2.4397   | 2.9528  | 2.2672   | 1.3225  | 2.5532   | 1.9306 | 0.0132 |
| NM_001291483 | Mdk           | 2.3738  | 2.2628  | 4.3763  | 5.9090   | 5.4241  | 5.9848   | 3.0043  | 5.7726   | 1.9215 | 0.0175 |
| NM_001291455 | Dpysl3        | 11.7238 | 12.3751 | 14.5280 | 32.6229  | 21.0294 | 20.4150  | 12.8756 | 24.6891  | 1.9175 | 0.0437 |
| NM_015775    | Tmprss2       | 1.3743  | 4.1847  | 3.9751  | 5.1694   | 6.9414  | 6.1596   | 3.1780  | 6.0901   | 1.9163 | 0.0487 |
| NM_011535    | Tbx3          | 1.7785  | 1.1153  | 1.1901  | 2.5112   | 2.9549  | 2.3337   | 1.3613  | 2.5999   | 1.9099 | 0.0114 |
| NM_001136086 | Dpysl3        | 12.0071 | 12.7245 | 14.9845 | 32.9875  | 21.6845 | 20.9483  | 13.2387 | 25.2068  | 1.9040 | 0.0402 |
| NM_009468    | Dpysl3        | 11.6058 | 12.3416 | 14.5346 | 31.9070  | 21.0079 | 20.2706  | 12.8273 | 24.3952  | 1.9018 | 0.0402 |
| NR_027924    | 2010204K13Rik | 1.7531  | 1.3926  | 1.5045  | 2.6183   | 3.0043  | 3.0938   | 1.5500  | 2.9055   | 1.8744 | 0.0017 |
| NM_001001650 | Prss48        | 0.1526  | 0.1212  | 0.1455  | 0.2532   | 0.2752  | 0.2565   | 0.1398  | 0.2616   | 1.8720 | 0.0005 |
| NM_138661    | Pcdha9        | 0.1898  | 0.2369  | 0.1551  | 0.4499   | 0.2690  | 0.3645   | 0.1939  | 0.3612   | 1.8622 | 0.0435 |
| NM_010784    | Mdk           | 2.2857  | 1.9224  | 3.9744  | 5.3549   | 4.7295  | 5.0846   | 2.7275  | 5.0563   | 1.8538 | 0.0240 |
| NM_001039543 | Mlf1          | 1.9956  | 3.2695  | 1.4272  | 4.1396   | 4.3873  | 3.8782   | 2.2307  | 4.1350   | 1.8536 | 0.0279 |
| NM_007796    | Ctla2a        | 33.1163 | 17.5932 | 22.2254 | 43.8423  | 37.8596 | 53.3561  | 24.3116 | 45.0193  | 1.8518 | 0.0325 |
| NM_001145799 | Ctla2a        | 34.0590 | 18.0939 | 22.8580 | 45.0002  | 38.9372 | 54.8749  | 25.0036 | 46.2708  | 1.8506 | 0.0327 |
| NR_027925    | 2010204K13Rik | 2.6376  | 2.0952  | 2.2636  | 3.7205   | 4.5201  | 4.6548   | 2.3321  | 4.2985   | 1.8432 | 0.0041 |
| NM_175654    | Hist1h4d      | 1.5740  | 1.8754  | 1.1256  | 2.9385   | 2.8393  | 2.6455   | 1.5250  | 2.8077   | 1.8411 | 0.0054 |

|              |               |         |         |         |         |         |         |         |         |        |        |
|--------------|---------------|---------|---------|---------|---------|---------|---------|---------|---------|--------|--------|
| NM_010801    | Mlf1          | 2.0761  | 3.4013  | 1.4847  | 4.3065  | 4.4472  | 4.0346  | 2.3207  | 4.2627  | 1.8368 | 0.0285 |
| NM_011836    | Lamc3         | 0.5616  | 1.2026  | 0.9547  | 1.5804  | 1.9822  | 1.4160  | 0.9063  | 1.6595  | 1.8311 | 0.0400 |
| NM_138663    | Pcdha12       | 0.1929  | 0.2408  | 0.1577  | 0.4116  | 0.2983  | 0.3706  | 0.1971  | 0.3602  | 1.8269 | 0.0164 |
| NM_001012335 | Mdk           | 2.8037  | 2.3582  | 4.8752  | 6.5686  | 5.6527  | 6.0984  | 3.3457  | 6.1066  | 1.8252 | 0.0281 |
| NR_027290    | Uckl1os       | 0.9328  | 1.2540  | 0.6158  | 1.5480  | 1.8769  | 1.6885  | 0.9342  | 1.7045  | 1.8245 | 0.0206 |
| NM_001204931 | Reep6         | 0.4490  | 0.7133  | 0.9277  | 1.1177  | 1.4849  | 1.1949  | 0.6967  | 1.2658  | 1.8170 | 0.0329 |
| NM_001291481 | Mdk           | 3.1359  | 2.6375  | 5.4528  | 7.1937  | 6.3223  | 6.8209  | 3.7421  | 6.7790  | 1.8116 | 0.0283 |
| NM_001291482 | Mdk           | 3.0848  | 2.5946  | 5.3640  | 7.0765  | 6.2193  | 6.7098  | 3.6811  | 6.6686  | 1.8116 | 0.0283 |
| NM_001012336 | Mdk           | 2.8134  | 2.3662  | 4.8919  | 6.4538  | 5.6720  | 6.1193  | 3.3572  | 6.0817  | 1.8116 | 0.0283 |
| NM_008398    | Itga7         | 3.6742  | 2.8900  | 2.2326  | 5.0810  | 4.4185  | 6.1451  | 2.9322  | 5.2149  | 1.7785 | 0.0250 |
| NM_001037918 | Lipt1         | 0.5587  | 1.0356  | 1.1544  | 1.6999  | 1.5118  | 1.6434  | 0.9162  | 1.6184  | 1.7663 | 0.0210 |
| NM_030139    | Zfp449        | 0.3099  | 0.1846  | 0.2586  | 0.3857  | 0.4193  | 0.5209  | 0.2510  | 0.4420  | 1.7605 | 0.0249 |
| NM_139292    | Reep6         | 0.4310  | 0.6847  | 0.9589  | 1.0728  | 1.4253  | 1.1469  | 0.6915  | 1.2150  | 1.7570 | 0.0484 |
| NM_001252347 | Rundc3a       | 3.7081  | 2.6056  | 2.4479  | 5.4040  | 5.2311  | 4.7142  | 2.9205  | 5.1164  | 1.7519 | 0.0080 |
| NR_102374    | Dmr           | 2.1453  | 2.0449  | 2.4547  | 2.8480  | 4.6438  | 4.1465  | 2.2150  | 3.8794  | 1.7515 | 0.0388 |
| NM_016759    | Rundc3a       | 4.6481  | 3.2188  | 3.0116  | 6.6256  | 6.5572  | 5.8592  | 3.6262  | 6.3473  | 1.7504 | 0.0088 |
| NM_009960    | Pcdha11       | 0.1929  | 0.2408  | 0.1577  | 0.4116  | 0.2734  | 0.3474  | 0.1971  | 0.3442  | 1.7458 | 0.0344 |
| NM_198884    | B4galnt3      | 1.6138  | 1.1266  | 1.8187  | 2.7999  | 2.5142  | 2.5892  | 1.5197  | 2.6344  | 1.7335 | 0.0074 |
| NM_021488    | Ghrl          | 0.5190  | 0.4123  | 0.4949  | 0.6460  | 0.9362  | 0.8723  | 0.4754  | 0.8182  | 1.7210 | 0.0217 |
| NM_009957    | Pcdha7        | 0.1944  | 0.2426  | 0.1589  | 0.4147  | 0.2755  | 0.3267  | 0.1986  | 0.3390  | 1.7066 | 0.0414 |
| NM_001003671 | Pcdhac1       | 0.1914  | 0.2389  | 0.1564  | 0.4084  | 0.2713  | 0.3217  | 0.1956  | 0.3338  | 1.7066 | 0.0414 |
| NM_138662    | Pcdha3        | 0.1938  | 0.2419  | 0.1584  | 0.4135  | 0.2747  | 0.3258  | 0.1980  | 0.3380  | 1.7066 | 0.0414 |
| NM_198117    | Pcdha2        | 0.1890  | 0.2359  | 0.1545  | 0.4032  | 0.2678  | 0.3176  | 0.1931  | 0.3295  | 1.7066 | 0.0414 |
| NM_054072    | Pcdha1        | 0.1931  | 0.2411  | 0.1579  | 0.4121  | 0.2738  | 0.3246  | 0.1974  | 0.3368  | 1.7066 | 0.0414 |
| NM_007767    | Pcdha6        | 0.1934  | 0.2414  | 0.1580  | 0.4126  | 0.2741  | 0.3250  | 0.1976  | 0.3372  | 1.7066 | 0.0414 |
| NM_007766    | Pcdha4        | 0.1905  | 0.2377  | 0.1557  | 0.4064  | 0.2699  | 0.3201  | 0.1946  | 0.3321  | 1.7066 | 0.0414 |
| NR_030432    | Mir761        | 11.4320 | 9.0810  | 5.4505  | 15.8093 | 15.4665 | 12.8096 | 8.6545  | 14.6951 | 1.6980 | 0.0381 |
| NM_001033346 | Lrrc55        | 0.2497  | 0.1983  | 0.3809  | 0.4972  | 0.4504  | 0.4196  | 0.2763  | 0.4557  | 1.6494 | 0.0381 |
| NM_177391    | Fam109b       | 0.4748  | 0.4190  | 0.4527  | 0.7003  | 0.8089  | 0.7093  | 0.4488  | 0.7395  | 1.6476 | 0.0016 |
| NM_009181    | St8sia2       | 4.5529  | 4.5154  | 3.0056  | 6.5496  | 6.0747  | 7.1090  | 4.0247  | 6.5778  | 1.6344 | 0.0124 |
| NM_175223    | Dnali1        | 0.3471  | 0.4411  | 0.5957  | 0.6336  | 0.7513  | 0.8751  | 0.4613  | 0.7533  | 1.6330 | 0.0440 |
| NM_172824    | Ccdc14        | 0.5641  | 0.5601  | 0.5043  | 0.9069  | 0.8268  | 0.8593  | 0.5429  | 0.8643  | 1.5922 | 0.0004 |
| NM_010636    | Klf12         | 1.6415  | 1.2437  | 1.5652  | 2.4726  | 2.0272  | 2.5467  | 1.4835  | 2.3488  | 1.5833 | 0.0130 |
| NR_045182    | 4932702P03Rik | 2.0986  | 2.0004  | 2.2013  | 3.1344  | 3.0285  | 3.7036  | 2.1001  | 3.2889  | 1.5660 | 0.0055 |
| NM_028448    | Cenpv         | 6.5820  | 3.7823  | 4.9409  | 7.4368  | 7.3261  | 9.1798  | 5.1017  | 7.9809  | 1.5643 | 0.0464 |
| NM_001286347 | Eml1          | 2.6479  | 3.9664  | 4.9778  | 6.0578  | 5.9025  | 6.0400  | 3.8640  | 6.0001  | 1.5528 | 0.0342 |
| NM_001043335 | Eml1          | 2.4366  | 3.6499  | 4.5805  | 5.5743  | 5.4315  | 5.5580  | 3.5557  | 5.5213  | 1.5528 | 0.0342 |
| NM_001286346 | Eml1          | 2.5898  | 3.8793  | 4.8684  | 5.9246  | 5.7728  | 5.9073  | 3.7791  | 5.8683  | 1.5528 | 0.0342 |
| NM_001043336 | Eml1          | 2.6837  | 4.0200  | 5.0450  | 6.1395  | 5.9822  | 6.1216  | 3.9162  | 6.0811  | 1.5528 | 0.0342 |
| NM_001081099 | Clhc1         | 0.9122  | 0.9057  | 0.6523  | 1.0407  | 1.3369  | 1.4373  | 0.8234  | 1.2716  | 1.5444 | 0.0378 |
| NM_153596    | Tmem17        | 0.6342  | 0.8396  | 0.7055  | 0.8770  | 1.2393  | 1.2436  | 0.7264  | 1.1200  | 1.5417 | 0.0440 |
| NM_001162909 | Spaca6        | 2.8908  | 3.4445  | 3.1325  | 4.2522  | 5.8073  | 4.5275  | 3.1559  | 4.8623  | 1.5407 | 0.0279 |
| NM_172614    | Tmem44        | 0.6146  | 0.4882  | 0.5860  | 0.7366  | 0.8315  | 1.0330  | 0.5629  | 0.8670  | 1.5402 | 0.0333 |
| NM_029264    | Ttll10        | 0.5649  | 0.5485  | 0.6584  | 0.8854  | 0.8492  | 0.9495  | 0.5906  | 0.8947  | 1.5149 | 0.0025 |
| NM_001048179 | Ccl27a        | 2.7510  | 2.9799  | 3.3387  | 5.3954  | 3.6091  | 4.6238  | 3.0232  | 4.5428  | 1.5026 | 0.0493 |
| NR_038028    | B230208H11Rik | 0.9308  | 1.1619  | 1.0144  | 0.5517  | 0.5997  | 0.8940  | 1.0357  | 0.6818  | 0.6583 | 0.0490 |
| NR_110421    | Eldr          | 0.5653  | 0.5132  | 0.5391  | 0.3351  | 0.4371  | 0.2715  | 0.5392  | 0.3479  | 0.6451 | 0.0193 |
| NM_146016    | Eml6          | 0.3943  | 0.3701  | 0.4272  | 0.3123  | 0.2748  | 0.1807  | 0.3972  | 0.2559  | 0.6443 | 0.0292 |
| NM_019925    | Gpr132        | 29.5665 | 30.2302 | 25.2494 | 22.3651 | 17.4570 | 14.7187 | 28.3487 | 18.1802 | 0.6413 | 0.0203 |
| NM_007825    | Cyp7b1        | 4.4123  | 3.0801  | 4.0161  | 2.2743  | 3.0149  | 2.0787  | 3.8362  | 2.4560  | 0.6402 | 0.0472 |
| NM_001206390 | Hk3           | 5.1631  | 6.6836  | 6.7011  | 4.6410  | 3.7944  | 3.3747  | 6.1826  | 3.9367  | 0.6367 | 0.0236 |
| NM_001206391 | Hk3           | 5.4039  | 6.9953  | 7.0137  | 4.8160  | 3.9714  | 3.5322  | 6.4710  | 4.1065  | 0.6346 | 0.0224 |
| NM_027279    | Mettl18       | 1.6884  | 1.8145  | 1.5153  | 1.0713  | 1.3437  | 0.7512  | 1.6727  | 1.0554  | 0.6309 | 0.0324 |
| NM_009326    | Tcea2         | 1.4941  | 1.2858  | 1.7809  | 0.8265  | 0.8984  | 1.1510  | 1.5203  | 0.9586  | 0.6306 | 0.0321 |
| NM_001033245 | Hk3           | 4.8133  | 6.3248  | 6.3914  | 4.3298  | 3.5299  | 3.1755  | 5.8432  | 3.6784  | 0.6295 | 0.0248 |
| NM_001206392 | Hk3           | 4.8595  | 6.4955  | 6.6388  | 4.3811  | 3.6244  | 3.2985  | 5.9980  | 3.7680  | 0.6282 | 0.0271 |
| NM_001301094 | Olr1          | 7.3686  | 9.0253  | 9.4289  | 7.2579  | 4.2449  | 4.4346  | 8.6076  | 5.3125  | 0.6172 | 0.0469 |
| NM_001301096 | Olr1          | 7.3780  | 9.1036  | 9.2866  | 7.1421  | 4.3033  | 4.3815  | 8.5894  | 5.2756  | 0.6142 | 0.0410 |
| NM_001289708 | Clec2i        | 1.5460  | 2.0979  | 1.4127  | 0.9621  | 0.9296  | 1.1909  | 1.6855  | 1.0275  | 0.6096 | 0.0432 |
| NM_001123371 | Pnp2          | 1.1840  | 0.9405  | 0.9032  | 0.4912  | 0.6407  | 0.6965  | 1.0092  | 0.6095  | 0.6039 | 0.0204 |
| NM_009109    | Ryr1          | 0.3205  | 0.3369  | 0.3146  | 0.2034  | 0.2466  | 0.1347  | 0.3240  | 0.1949  | 0.6014 | 0.0178 |
| NM_001081124 | Map7d2        | 0.1879  | 0.2089  | 0.2508  | 0.1559  | 0.1356  | 0.0947  | 0.2159  | 0.1287  | 0.5963 | 0.0278 |
| NM_027948    | 1700003E16Rik | 0.2825  | 0.2244  | 0.2021  | 0.1172  | 0.1274  | 0.1781  | 0.2364  | 0.1409  | 0.5962 | 0.0352 |
| NM_029525    | Prex2         | 0.2882  | 0.2810  | 0.3248  | 0.2174  | 0.1063  | 0.2092  | 0.2980  | 0.1776  | 0.5961 | 0.0345 |
| NM_009042    | Reg1          | 2.0713  | 1.9445  | 2.8729  | 1.2499  | 1.3587  | 1.4242  | 2.2963  | 1.3443  | 0.5854 | 0.0321 |

|              |               |         |         |         |         |         |         |         |         |        |        |
|--------------|---------------|---------|---------|---------|---------|---------|---------|---------|---------|--------|--------|
| NM_177897    | B4galnt4      | 0.8394  | 0.9632  | 1.0228  | 0.3483  | 0.7151  | 0.5879  | 0.9418  | 0.5504  | 0.5844 | 0.0313 |
| NM_183312    | Synm          | 0.3529  | 0.3059  | 0.3060  | 0.1864  | 0.2605  | 0.1079  | 0.3216  | 0.1849  | 0.5749 | 0.0431 |
| NM_028518    | Col20a1       | 0.3111  | 0.3844  | 0.3955  | 0.1721  | 0.2494  | 0.2034  | 0.3637  | 0.2083  | 0.5727 | 0.0110 |
| NM_008598    | Mgmt          | 9.5476  | 8.7077  | 8.7669  | 4.2544  | 5.1030  | 5.9434  | 9.0074  | 5.1003  | 0.5662 | 0.0022 |
| NR_045821    | 6330418K02Rik | 1.9542  | 2.1732  | 2.4224  | 1.1350  | 1.4101  | 1.1496  | 2.1833  | 1.2316  | 0.5641 | 0.0042 |
| NR_028264    | Dleu2         | 2.6499  | 3.8704  | 3.9125  | 2.2697  | 2.2359  | 1.3649  | 3.4776  | 1.9568  | 0.5627 | 0.0404 |
| NR_045889    | Gm10791       | 1.3132  | 1.8081  | 1.8366  | 0.7991  | 1.1055  | 0.8829  | 1.6527  | 0.9291  | 0.5622 | 0.0200 |
| NM_010229    | FIt3          | 0.5149  | 0.4405  | 0.6421  | 0.2629  | 0.2858  | 0.3329  | 0.5325  | 0.2939  | 0.5519 | 0.0187 |
| NM_172776    | Slc22a29      | 0.4591  | 0.4689  | 0.5003  | 0.2177  | 0.2366  | 0.3307  | 0.4761  | 0.2617  | 0.5496 | 0.0044 |
| NR_105958    | Mir6992       | 9.2994  | 6.3317  | 7.6007  | 3.3069  | 4.7929  | 4.4657  | 7.7439  | 4.1885  | 0.5409 | 0.0215 |
| NR_027388    | 1700096K18Rik | 0.3997  | 0.3175  | 0.3812  | 0.2488  | 0.0901  | 0.2519  | 0.3661  | 0.1969  | 0.5379 | 0.0454 |
| NM_013566    | Itgb7         | 3.7365  | 3.4843  | 3.4081  | 2.1568  | 1.4653  | 2.0934  | 3.5430  | 1.9052  | 0.5377 | 0.0025 |
| NM_001099319 | Gm12942       | 3.4326  | 4.2415  | 5.2128  | 1.5823  | 2.9814  | 2.3505  | 4.2956  | 2.3047  | 0.5365 | 0.0383 |
| NM_001290316 | Vsig10l       | 0.6309  | 0.8018  | 0.6417  | 0.3141  | 0.3035  | 0.4948  | 0.6914  | 0.3708  | 0.5363 | 0.0182 |
| NM_001014995 | Fam189b       | 0.7574  | 1.0529  | 1.1736  | 0.7070  | 0.5123  | 0.3580  | 0.9946  | 0.5258  | 0.5286 | 0.0425 |
| NM_177191    | Sycp2         | 0.3055  | 0.2427  | 0.2428  | 0.2113  | 0.0919  | 0.1070  | 0.2637  | 0.1367  | 0.5185 | 0.0418 |
| NM_026793    | Myct1         | 0.6774  | 0.5381  | 0.8447  | 0.4756  | 0.2350  | 0.3503  | 0.6867  | 0.3536  | 0.5150 | 0.0416 |
| NM_011268    | Rgs9          | 0.6990  | 0.5090  | 0.8331  | 0.2900  | 0.2627  | 0.4895  | 0.6804  | 0.3474  | 0.5106 | 0.0479 |
| NM_001085501 | Ppp1r3d       | 1.0223  | 1.6594  | 1.5257  | 0.8482  | 0.8018  | 0.4856  | 1.4025  | 0.7118  | 0.5076 | 0.0373 |
| NR_033457    | Gm6225        | 0.3407  | 0.2030  | 0.3249  | 0.1414  | 0.1537  | 0.1432  | 0.2895  | 0.1461  | 0.5045 | 0.0304 |
| NM_008005    | Fgf18         | 1.1298  | 0.7479  | 0.8080  | 0.3906  | 0.3397  | 0.5539  | 0.8952  | 0.4280  | 0.4781 | 0.0258 |
| NR_102395    | Fgf18         | 1.0963  | 0.7257  | 0.7840  | 0.3790  | 0.3296  | 0.5374  | 0.8687  | 0.4154  | 0.4781 | 0.0258 |
| NM_010612    | Kdr           | 1.0626  | 0.9074  | 1.2919  | 0.8376  | 0.3594  | 0.3572  | 1.0873  | 0.5181  | 0.4765 | 0.0432 |
| NM_023612    | Esm1          | 0.9640  | 1.2033  | 1.3132  | 0.8570  | 0.5589  | 0.2315  | 1.1602  | 0.5491  | 0.4733 | 0.0425 |
| NR_045640    | Gm20199       | 0.2174  | 0.1727  | 0.2073  | 0.0301  | 0.1307  | 0.1218  | 0.1991  | 0.0942  | 0.4730 | 0.0397 |
| NR_106138.1  | Mir7676-2     | 51.3823 | 70.4997 | 73.4936 | 31.0066 | 35.8114 | 23.5531 | 65.1252 | 30.1237 | 0.4626 | 0.0109 |
| NR_106137.1  | Mir7676-1     | 51.3823 | 70.4997 | 73.4936 | 31.0066 | 35.8114 | 23.5531 | 65.1252 | 30.1237 | 0.4626 | 0.0109 |
| NM_019790    | Tmeff2        | 0.3903  | 0.7234  | 0.7444  | 0.2159  | 0.3129  | 0.3280  | 0.6194  | 0.2856  | 0.4611 | 0.0497 |
| NM_133222    | Eltcd1        | 1.0933  | 1.2326  | 1.4124  | 0.7901  | 0.5089  | 0.4149  | 1.2461  | 0.5713  | 0.4585 | 0.0098 |
| NM_001081199 | Mamdc4        | 0.2178  | 0.2595  | 0.2769  | 0.0903  | 0.1637  | 0.0915  | 0.2514  | 0.1152  | 0.4582 | 0.0104 |
| NM_001082547 | Gm5483        | 24.1926 | 18.1033 | 25.7435 | 14.8370 | 7.2735  | 8.5449  | 22.6798 | 10.2185 | 0.4506 | 0.0195 |
| NM_008653    | Mybpc3        | 0.2791  | 0.2217  | 0.2329  | 0.1737  | 0.0944  | 0.0586  | 0.2446  | 0.1089  | 0.4453 | 0.0239 |
| NR_046069    | Gm2848        | 0.5927  | 0.9415  | 0.7535  | 0.4917  | 0.3564  | 0.1660  | 0.7626  | 0.3380  | 0.4433 | 0.0372 |
| NR_037959    | 1600010M07Rik | 0.9403  | 1.1204  | 1.1208  | 0.7802  | 0.4240  | 0.1976  | 1.0605  | 0.4673  | 0.4406 | 0.0300 |
| NM_001033636 | Prex2         | 0.3101  | 0.3167  | 0.2746  | 0.1838  | 0.0799  | 0.1303  | 0.3005  | 0.1313  | 0.4371 | 0.0067 |
| NM_133720    | Cysltr2       | 0.4821  | 0.5745  | 0.5364  | 0.4001  | 0.2174  | 0.0675  | 0.5310  | 0.2283  | 0.4300 | 0.0387 |
| NM_001162412 | Cysltr2       | 0.4979  | 0.5933  | 0.5539  | 0.4131  | 0.2245  | 0.0697  | 0.5484  | 0.2358  | 0.4300 | 0.0387 |
| NM_021715    | Chst7         | 0.9896  | 0.7861  | 1.2581  | 0.7116  | 0.2975  | 0.2772  | 1.0112  | 0.4288  | 0.4240 | 0.0416 |
| NM_001033248 | Gm266         | 0.3575  | 0.5680  | 0.5682  | 0.0989  | 0.2150  | 0.3005  | 0.4979  | 0.2048  | 0.4113 | 0.0326 |
| NR_040265    | 2310001H17Rik | 2.6073  | 3.3456  | 4.3986  | 2.3298  | 0.7236  | 1.1798  | 3.4505  | 1.4111  | 0.4089 | 0.0446 |
| NM_001101486 | Fam71f2       | 3.2015  | 2.3475  | 3.2876  | 1.4304  | 1.3327  | 0.8278  | 2.9455  | 1.1970  | 0.4064 | 0.0078 |
| NM_019577    | Ccl24         | 65.1565 | 81.8298 | 60.6305 | 28.8958 | 29.9918 | 25.2067 | 69.2056 | 28.0314 | 0.4050 | 0.0034 |
| NM_181390    | Mustn1        | 1.4738  | 1.1707  | 1.2883  | 0.5095  | 0.3323  | 0.7225  | 1.3110  | 0.5215  | 0.3978 | 0.0053 |
| NM_001267846 | Fign          | 0.0443  | 0.0234  | 0.0281  | 0.0122  | 0.0133  | 0.0124  | 0.0319  | 0.0126  | 0.3960 | 0.0378 |
| NM_001267847 | Fign          | 0.0443  | 0.0235  | 0.0282  | 0.0123  | 0.0133  | 0.0124  | 0.0320  | 0.0127  | 0.3960 | 0.0378 |
| NM_021716    | Fign          | 0.0445  | 0.0236  | 0.0283  | 0.0123  | 0.0134  | 0.0125  | 0.0321  | 0.0127  | 0.3960 | 0.0378 |
| NR_015553    | 9430076C15Rik | 0.3346  | 0.5316  | 0.5014  | 0.1983  | 0.2156  | 0.1205  | 0.4559  | 0.1782  | 0.3908 | 0.0150 |
| NM_001170976 | Dbndd1        | 0.4310  | 0.3423  | 0.4109  | 0.0894  | 0.0972  | 0.2716  | 0.3948  | 0.1527  | 0.3869 | 0.0207 |
| NM_001165965 | Fndc7         | 0.1191  | 0.1182  | 0.1703  | 0.0741  | 0.0537  | 0.0250  | 0.1359  | 0.0509  | 0.3749 | 0.0191 |
| NM_177091    | Fndc7         | 0.1131  | 0.1123  | 0.1617  | 0.0704  | 0.0510  | 0.0238  | 0.1290  | 0.0484  | 0.3749 | 0.0191 |
| NM_009892    | Chil3         | 43.0933 | 42.6021 | 36.4263 | 11.6325 | 17.4820 | 15.5771 | 40.7072 | 14.8972 | 0.3660 | 0.0007 |
| NM_010452    | Hoxa3         | 0.1708  | 0.2262  | 0.2715  | 0.0945  | 0.0514  | 0.0957  | 0.2228  | 0.0805  | 0.3614 | 0.0120 |
| NM_021381    | Prokr1        | 0.1428  | 0.1418  | 0.2383  | 0.0592  | 0.0644  | 0.0600  | 0.1743  | 0.0612  | 0.3512 | 0.0242 |
| NM_080437    | Celsr3        | 0.0878  | 0.0498  | 0.1076  | 0.0312  | 0.0113  | 0.0422  | 0.0817  | 0.0282  | 0.3453 | 0.0496 |
| NM_147218    | Abca6         | 0.1658  | 0.3074  | 0.2108  | 0.0917  | 0.0748  | 0.0697  | 0.2280  | 0.0787  | 0.3453 | 0.0242 |
| NR_040266    | 2310001H17Rik | 3.2400  | 4.3555  | 3.5649  | 2.4816  | 0.4496  | 0.8378  | 3.7201  | 1.2563  | 0.3377 | 0.0251 |
| NR_040268    | 2310001H17Rik | 3.3142  | 4.4552  | 3.6465  | 2.5384  | 0.4599  | 0.8570  | 3.8053  | 1.2851  | 0.3377 | 0.0251 |
| NM_172603    | Phf11a        | 0.4278  | 0.4248  | 0.5099  | 0.2662  | 0.1929  | 0.0000  | 0.4541  | 0.1530  | 0.3370 | 0.0232 |
| NM_001048176 | Cerkl         | 0.3293  | 0.5231  | 0.6280  | 0.1366  | 0.2228  | 0.1384  | 0.4935  | 0.1659  | 0.3362 | 0.0236 |
| NM_001271019 | Siglec5       | 1.5034  | 2.2451  | 1.4909  | 0.8981  | 0.7051  | 0.1011  | 1.7465  | 0.5681  | 0.3253 | 0.0272 |
| NM_145581    | Siglec5       | 1.4423  | 2.1539  | 1.4303  | 0.8616  | 0.6764  | 0.0970  | 1.6755  | 0.5450  | 0.3253 | 0.0272 |
| NM_153101    | Mrgpra2b      | 0.2298  | 0.3652  | 0.3288  | 0.1907  | 0.1037  | 0.0000  | 0.3079  | 0.0981  | 0.3187 | 0.0373 |
| NM_001177471 | Gm15056       | 4.1505  | 5.4949  | 6.5961  | 1.5306  | 2.0797  | 1.5502  | 5.4138  | 1.7202  | 0.3177 | 0.0072 |
| NR_040374    | A230028O05Rik | 0.2592  | 0.2883  | 0.2966  | 0.0430  | 0.0935  | 0.1307  | 0.2814  | 0.0891  | 0.3166 | 0.0023 |
| NM_007567    | Bsn           | 0.0273  | 0.0217  | 0.0260  | 0.0075  | 0.0082  | 0.0076  | 0.0250  | 0.0078  | 0.3120 | 0.0006 |

|              |               |         |         |         |         |        |        |         |        |        |        |
|--------------|---------------|---------|---------|---------|---------|--------|--------|---------|--------|--------|--------|
| NM_010225    | Foxf2         | 0.2448  | 0.1458  | 0.1167  | 0.0508  | 0.0552 | 0.0514 | 0.1691  | 0.0525 | 0.3103 | 0.0397 |
| NM_183183    | Gprn3         | 0.2803  | 0.3339  | 0.3563  | 0.0388  | 0.1685 | 0.0785 | 0.3235  | 0.0953 | 0.2945 | 0.0069 |
| NM_009217    | Sstr2         | 0.7562  | 1.8020  | 1.0816  | 0.3137  | 0.3410 | 0.3972 | 1.2132  | 0.3506 | 0.2890 | 0.0497 |
| NR_015489    | 2900041M22Rik | 0.2155  | 0.3423  | 0.4109  | 0.0894  | 0.0000 | 0.1811 | 0.3229  | 0.0902 | 0.2792 | 0.0399 |
| NM_010780    | Cma1          | 8.7475  | 12.0798 | 14.1159 | 7.7048  | 0.7283 | 0.4524 | 11.6477 | 2.9618 | 0.2543 | 0.0378 |
| NM_205810    | Mrgprb1       | 0.2422  | 0.1374  | 0.2310  | 0.0287  | 0.0624 | 0.0582 | 0.2035  | 0.0498 | 0.2445 | 0.0116 |
| NR_024323    | 4930426L09Rik | 0.2923  | 0.4644  | 0.2788  | 0.0000  | 0.0879 | 0.1638 | 0.3452  | 0.0839 | 0.2430 | 0.0266 |
| NM_009464    | Ucp3          | 0.1183  | 0.2819  | 0.2256  | 0.0982  | 0.0534 | 0.0000 | 0.2086  | 0.0505 | 0.2421 | 0.0471 |
| NM_007753    | Cpa3          | 8.9693  | 12.8246 | 15.9651 | 7.3595  | 0.8989 | 0.2513 | 12.5863 | 2.8366 | 0.2254 | 0.0327 |
| NM_013805    | Cldn5         | 0.7158  | 0.9748  | 1.0726  | 0.3394  | 0.1845 | 0.0859 | 0.9211  | 0.2033 | 0.2207 | 0.0052 |
| NM_017385    | Ear7          | 0.6188  | 0.7373  | 1.1802  | 0.2567  | 0.2791 | 0.0000 | 0.8454  | 0.1786 | 0.2113 | 0.0259 |
| NM_053111    | Ear6          | 0.4068  | 0.4847  | 0.7757  | 0.1688  | 0.1834 | 0.0000 | 0.5557  | 0.1174 | 0.2113 | 0.0259 |
| NM_010779    | Mcpt4         | 15.2118 | 24.1670 | 26.5000 | 12.7432 | 0.9235 | 0.2458 | 21.9596 | 4.6375 | 0.2112 | 0.0312 |
| NM_001042606 | Sstr2         | 0.8632  | 1.9714  | 0.9260  | 0.1791  | 0.2920 | 0.2720 | 1.2535  | 0.2477 | 0.1976 | 0.0495 |
| NM_028392    | Ppp2r2b       | 0.2090  | 0.1660  | 0.2657  | 0.0000  | 0.1256 | 0.0000 | 0.2135  | 0.0419 | 0.1961 | 0.0279 |
| NM_021272    | Fabp7         | 0.5701  | 0.6038  | 0.5436  | 0.1577  | 0.1714 | 0.0000 | 0.5725  | 0.1097 | 0.1916 | 0.0013 |
| NM_010781    | Tpsb2         | 10.9136 | 15.4354 | 17.8944 | 7.3990  | 0.8403 | 0.2237 | 14.7478 | 2.8210 | 0.1913 | 0.0178 |
| NR_015543    | 2810055G20Rik | 0.1379  | 0.1825  | 0.3067  | 0.0381  | 0.0414 | 0.0386 | 0.2090  | 0.0394 | 0.1885 | 0.0284 |
| NM_031187    | Tpsab1        | 7.9029  | 14.2937 | 16.5788 | 6.0529  | 0.8773 | 0.3065 | 12.9251 | 2.4122 | 0.1866 | 0.0296 |
| NR_033521    | Tpsab1        | 8.6114  | 15.5753 | 18.0652 | 6.5956  | 0.9559 | 0.3340 | 14.0840 | 2.6285 | 0.1866 | 0.0296 |
| NM_029360    | Tm4sf5        | 0.4456  | 1.0618  | 0.8497  | 0.3697  | 0.0000 | 0.0000 | 0.7857  | 0.1232 | 0.1568 | 0.0388 |
| NM_019779    | Cyp11a1       | 0.3265  | 0.8429  | 0.6227  | 0.0677  | 0.0736 | 0.1372 | 0.5974  | 0.0928 | 0.1554 | 0.0290 |
| NR_034045    | Snora30       | 2.7066  | 2.1500  | 2.5809  | 1.1229  | 0.0000 | 0.0000 | 2.4792  | 0.3743 | 0.1510 | 0.0068 |
| NM_146515    | Olf99         | 0.3155  | 0.3759  | 0.3008  | 0.0000  | 0.0000 | 0.1326 | 0.3307  | 0.0442 | 0.1336 | 0.0045 |
| NM_001242943 | Gm14436       | 0.0719  | 0.0571  | 0.1371  | 0.0000  | 0.0000 | 0.0302 | 0.0887  | 0.0101 | 0.1135 | 0.0415 |
| NM_001242944 | Gm14306       | 0.2236  | 0.1776  | 0.4265  | 0.0000  | 0.0000 | 0.0940 | 0.2759  | 0.0313 | 0.1135 | 0.0415 |
| NM_001285937 | Zdbf2         | 0.0343  | 0.0364  | 0.0328  | 0.0000  | 0.0000 | 0.0096 | 0.0345  | 0.0032 | 0.0930 | 0.0008 |
| NM_001267872 | Zdbf2         | 0.0346  | 0.0366  | 0.0330  | 0.0000  | 0.0000 | 0.0097 | 0.0347  | 0.0032 | 0.0930 | 0.0008 |
| NM_028673    | Zdbf2         | 0.0344  | 0.0365  | 0.0328  | 0.0000  | 0.0000 | 0.0096 | 0.0346  | 0.0032 | 0.0930 | 0.0008 |
| NM_001285936 | Zdbf2         | 0.0342  | 0.0362  | 0.0326  | 0.0000  | 0.0000 | 0.0096 | 0.0343  | 0.0032 | 0.0930 | 0.0008 |
| NM_153508    | Clstn3        | 0.0361  | 0.0287  | 0.0345  | 0.0000  | 0.0000 | 0.0000 | 0.0331  | 0.0000 | 0.0000 | 0.0001 |
| NR_110990    | Pla2g10       | 0.0950  | 0.0755  | 0.0906  | 0.0000  | 0.0000 | 0.0000 | 0.0870  | 0.0000 | 0.0000 | 0.0001 |
| NR_027377    | Gm17769       | 0.0565  | 0.0449  | 0.0539  | 0.0000  | 0.0000 | 0.0000 | 0.0517  | 0.0000 | 0.0000 | 0.0001 |
| NR_033602    | Gm5779        | 0.1597  | 0.1268  | 0.1522  | 0.0000  | 0.0000 | 0.0000 | 0.1462  | 0.0000 | 0.0000 | 0.0001 |
| NM_011987    | Pla2g10       | 0.1016  | 0.0807  | 0.0969  | 0.0000  | 0.0000 | 0.0000 | 0.0931  | 0.0000 | 0.0000 | 0.0001 |
| NR_049190    | Mir5617       | 2.5404  | 2.0180  | 2.4224  | 0.0000  | 0.0000 | 0.0000 | 2.3270  | 0.0000 | 0.0000 | 0.0001 |
| NR_125720    | 4930445N18Rik | 0.1634  | 0.1298  | 0.1558  | 0.0000  | 0.0000 | 0.0000 | 0.1497  | 0.0000 | 0.0000 | 0.0001 |
| NM_008227    | Hcn3          | 0.0444  | 0.0353  | 0.0423  | 0.0000  | 0.0000 | 0.0000 | 0.0407  | 0.0000 | 0.0000 | 0.0001 |
| NR_037986    | Gm16880       | 0.1208  | 0.0959  | 0.1152  | 0.0000  | 0.0000 | 0.0000 | 0.1106  | 0.0000 | 0.0000 | 0.0001 |
| NM_001291009 | Pla2g10       | 0.0963  | 0.0765  | 0.0918  | 0.0000  | 0.0000 | 0.0000 | 0.0882  | 0.0000 | 0.0000 | 0.0001 |
| NM_172430    | Sphkap        | 0.0222  | 0.0177  | 0.0212  | 0.0000  | 0.0000 | 0.0000 | 0.0204  | 0.0000 | 0.0000 | 0.0001 |
| NM_177544    | Ang4          | 0.2084  | 0.3310  | 0.1987  | 0.0000  | 0.0000 | 0.0000 | 0.2460  | 0.0000 | 0.0000 | 0.0045 |
| NM_008954    | Pspn          | 0.3055  | 0.4853  | 0.2913  | 0.0000  | 0.0000 | 0.0000 | 0.3607  | 0.0000 | 0.0000 | 0.0045 |
| NM_001142539 | Gm9992        | 0.0909  | 0.1444  | 0.0867  | 0.0000  | 0.0000 | 0.0000 | 0.1073  | 0.0000 | 0.0000 | 0.0045 |
| NM_001141925 | Bean1         | 0.0912  | 0.0724  | 0.1304  | 0.0000  | 0.0000 | 0.0000 | 0.0980  | 0.0000 | 0.0000 | 0.0046 |
| NM_001141922 | Bean1         | 0.0854  | 0.0678  | 0.1222  | 0.0000  | 0.0000 | 0.0000 | 0.0918  | 0.0000 | 0.0000 | 0.0046 |
| NM_001141924 | Bean1         | 0.0912  | 0.0725  | 0.1305  | 0.0000  | 0.0000 | 0.0000 | 0.0981  | 0.0000 | 0.0000 | 0.0046 |
| NM_176844    | Chna5         | 0.0529  | 0.0840  | 0.1009  | 0.0000  | 0.0000 | 0.0000 | 0.0793  | 0.0000 | 0.0000 | 0.0049 |
| NM_019991    | Pr12a1        | 0.4993  | 0.6611  | 0.3174  | 0.0000  | 0.0000 | 0.0000 | 0.4926  | 0.0000 | 0.0000 | 0.0077 |
| NR_033550    | Gm10248       | 0.0530  | 0.1264  | 0.1012  | 0.0000  | 0.0000 | 0.0000 | 0.0935  | 0.0000 | 0.0000 | 0.0122 |
| NR_045876    | F630206G17Rik | 0.0604  | 0.0480  | 0.1153  | 0.0000  | 0.0000 | 0.0000 | 0.0746  | 0.0000 | 0.0000 | 0.0226 |
| NM_001127576 | Gm1564        | 0.0949  | 0.1005  | 0.0302  | 0.0000  | 0.0000 | 0.0000 | 0.0752  | 0.0000 | 0.0000 | 0.0291 |
| NR_038017    | Gm15915       | 0.1595  | 0.2534  | 0.4562  | 0.0000  | 0.0000 | 0.0000 | 0.2897  | 0.0000 | 0.0000 | 0.0297 |
| NR_040445    | 1700017G19Rik | 0.1187  | 0.0472  | 0.0566  | 0.0000  | 0.0000 | 0.0000 | 0.0742  | 0.0000 | 0.0000 | 0.0298 |
| NR_029908    | Mir215        | 2.6091  | 1.0363  | 3.7319  | 0.0000  | 0.0000 | 0.0000 | 2.4591  | 0.0000 | 0.0000 | 0.0347 |
| NM_001290735 | Osbpl6        | 0.1141  | 0.2719  | 0.1088  | 0.0000  | 0.0000 | 0.0000 | 0.1649  | 0.0000 | 0.0000 | 0.0368 |
| NR_037977    | Gm53          | 0.2347  | 0.5593  | 0.2238  | 0.0000  | 0.0000 | 0.0000 | 0.3393  | 0.0000 | 0.0000 | 0.0368 |
| NR_037973    | Gm20597       | 0.0264  | 0.0629  | 0.0252  | 0.0000  | 0.0000 | 0.0000 | 0.0382  | 0.0000 | 0.0000 | 0.0368 |

## Supplementary References

1. Xu Y, *et al.* (2017) Breast tumor cell-specific knockout of Twist1 inhibits cancer cell plasticity, dissemination, and lung metastasis in mice. *Proc Natl Acad Sci U S A* 114(43):11494-11499.
2. Lee DK, Liu Y, Liao L, Wang F, & Xu J (2014) The prostate basal cell (BC) heterogeneity and the p63-positive BC differentiation spectrum in mice. *Int J Biol Sci* 10(9):1007-1017.
3. Li LC & Dahiya R (2002) MethPrimer: designing primers for methylation PCRs. *Bioinformatics* 18(11):1427-1431.
4. Liao Y, Smyth GK, & Shi W (2014) featureCounts: an efficient general purpose program for assigning sequence reads to genomic features. *Bioinformatics* 30(7):923-930.
5. Love MI, Huber W, & Anders S (2014) Moderated estimation of fold change and dispersion for RNA-seq data with DESeq2. *Genome Biol* 15(12):550.
6. Huang da W, Sherman BT, & Lempicki RA (2009) Systematic and integrative analysis of large gene lists using DAVID bioinformatics resources. *Nat Protoc* 4(1):44-57.
